# Supplementary material
Source: PubMed Central journal article supplement (PMC9329208)
Supplement: NIHMS1805426-supplement-1.pdf [file NIHMS1805426-supplement-1.pdf]

## **ONLINE SUPPLEMENT**

### **Table of content:**

- 1. SUPPLEMENTARY METHODS (WITH REFERENCES)**
- 2. SUPPLEMENTARY TABLES (Table S1-S5)**
- 3. SUPPLEMENTARY FIGURES AND LEGENDS (Figure S1-S7)**

Journal Pre-proof

## 1. SUPPLEMENTARY METHODS (WITH REFERENCES)

**Animal Models of Intrahepatic Cholangiocarcinoma.** 10 µg *pT3-EF1α-myrAkt-HA*, 20 µg of *pT3-EF1α-Myc-N1ICD/pT3-EF1α-Flag-YAP1 S127A* and 60 µg mg of *pCMV-Cre* (or *pCMV-empty*), or 10 µg *pT3-EF1α-myrAkt-HA* and 20 µg of *pT3-EF1α-Sox9*, or µg mg of *pT3-EF1α-myrAkt-HA-sh-Luciferase*, 20 µg of *pT3-EF1α-Myc-N1ICD*, or 10 µg of *pT3-EF1α-myrAkt-HA-Sh-Yap1*, 20 µg of *pT3-EF1α-Myc-N1ICD*, or 10 µg of *pT3-EF1α-myrAkt-HA-Sh-Dnmt1*, 20 µg of *pT3-EF1α-Myc-N1ICD*, or 10 µg of *pT3-EF1α-myrAkt-HA*, 20 µg of *pT3-EF1α-Myc-N1ICD*, 60 µg of *pT3-EF5α-Dn-TEAD*, or 20 µg of *pT3-EF1α-Myc-N1ICD*, 60 µg of *pT3-EF5α-Dn-TEAD*, or 10 µg of *pT3-EF1α-myrAkt-HA-sh-Yap1*, 20 µg of *pT3-EF1α-Myc-N1ICD*, 10 µg and 40 µg of *pT3-EF1α-Dnmt1-V5*, or 10 µg of *pT3-EF1α-myrAkt-HA*, 20 µg of *pT3-EF1α-Myc-N1ICD*, 60 µg of *pT3-EF5α-Dn-TEAD*, 40 µg of *pT3-EF1α-Dnmt-V5*, or 10 µg of *pT3-EF1α-myrAkt-HA-sh-Luciferase*, 20 µg of *pT3-EF1α-Myc-N1ICD* and 40 µg of *pCMV-empty*, or 10 µg of *pT3-EF1α-myrAkt-HA-sh-Yap1*, 20 µg of *pT3-EF1α-Myc-N1ICD* and 40 µg of *pCMV-Cre*, or 10 µg of *pT3-EF1α-myrAkt-HA*, 20 µg of *Fbxw7ΔF*, or 10 µg of *Kras G12D*, 40 µg of *sh-p53* along with the transposase in a ratio of 25:1 were diluted in 2 ml of normal saline (0.9% NaCl), filtered through 0.22µm filter (Millipore), and hydrodynamically injected into the lateral tail vein of mice<sup>1-3</sup>. All animals were sacrificed between 2-5 weeks of plasmids injections unless otherwise indicated.

**Immunohistochemistry (IHC).** Mouse liver tissues were fixed for 48 h in 10% neutralized formalin (Fisher Chemicals), transferred into 70% ethanol and then dehydrated and

embedded in paraffin. For IHC, formalin-fixed sections were deparaffinized in graded xylene and ethanol and rinsed in PBS. For antigen retrieval, samples were microwaved for 12 min in pH 6.0 sodium citrate buffer (HA-tag, Myc-tag, panCK, SOX9) or pH 9.0 Tris-EDTA buffer (p-AKT) or DAKO (V5-tag), or were pressure cooked for 20 min in pH 9.0 Tris-EDTA buffer (YAP1 and HNF4 $\alpha$ ) or were autoclaved for 1 h in pH 9.0 Tris-EDTA buffer (DNMT1). After cooling, samples were placed in 3% H<sub>2</sub>O<sub>2</sub> (Fisher Chemicals) for 10 min to quench endogenous peroxidase activity. After washing with PBS, slides were blocked with Super Block (ScyTek Laboratories) for 10 min. Sections were incubated for overnight at 4°C with the primary antibodies (Supplementary Table 2). Sections were then incubated with species-specific biotinylated secondary antibodies (EMD Millipore, Supplementary Table 2) for 1 h, at room temperature. Sections were incubated with Vectastain ABC Elite kit (Vector Laboratories) and signal was detected with DAB Peroxidase Substrate Kit (Vector Laboratories) followed by quenching in distilled water for 5 min. Slides were counterstained with hematoxylin (ThermoFisher Scientific), dehydrated to xylene (Fisher Chemicals) and coverslips applied with Cytoseal XYL (ThermoFisher Scientific).

**Immunofluorescence.** Paraffin embedded liver sections (5  $\mu$ m thick) were deparaffinized using xylene (Fisher Chemicals) and rehydrated by incubating the slices in ethanol (100% and 95% v/v, each 3x5 min) and washed in PBS. Heat-induced epitope retrieval was performed for 20 min using a pressure cooker with pH 6.0 sodium citrate buffer. Sections were washed in PBS, permeabilized for 5 minutes with PBS/0.3% Triton X and blocked with PBS/0.3% Triton X/10% bovine serum albumin (BSA) for 45 minutes

at room temperature. Sections were incubated with primary antibodies in PBS/0.3% Triton X/10% BSA overnight at 4C. At the end of the incubation, sections were washed thrice and incubated with fluorochrome-conjugated secondary antibodies in PBS/0.3% Triton X/10% BSA for 1h at room temperature, then washed in PBS/0.1% Triton X 3 times. Liver sections were mounted using Prolong Gold Antifade w/DAPI (Invitrogen) and pictures were acquired using LSM700 confocal microscope and the Zen Software (Zeiss).

### **DNMT1 ChIP-seq analysis.**

Chromatin Immunoprecipitation: Frozen liver tissue was sent to Active Motif Services (Carlsbad, CA) for ChIP-Seq. Active Motif prepared chromatin, performed ChIP reactions, generated libraries, sequenced the libraries, and performed basic data analysis. In brief, tissue was submersed in PBS + 1% formaldehyde, cut into small pieces, and incubated at room temperature for 15 minutes. Fixation was stopped by the addition of 0.125 M glycine (final). The tissue pieces were then treated with a TissueTearer and finally spun down and washed 2x in PBS. Chromatin was isolated by adding lysis buffer, followed by disruption with a Dounce homogenizer. Lysates were sonicated and the DNA sheared to an average length of 300-500 bp with Active Motif's EpiShear probe sonicator (cat# 53051). Genomic DNA (Input) was prepared by treating aliquots of chromatin with RNase, proteinase K and heat for de-crosslinking, followed by SPRI beads clean up (Beckman Coulter) and quantitation by Clariostar (BMG Labtech). Extrapolation to the original chromatin volume allowed determination of the total chromatin yield. An aliquot of chromatin (40 ug) was precleared with protein A agarose beads (Invitrogen). Genomic DNA regions of interest were isolated using antibodies against DNMT1 (Cell Signaling Technology, cat#:5032). Complexes were washed, eluted from the beads with SDS

buffer, and subjected to RNase and proteinase K treatment. Crosslinks were reversed by incubation overnight at 65C, and ChIP DNA was purified by phenol-chloroform extraction and ethanol precipitation.

ChIP-Sequencing (Illumina): Illumina sequencing libraries (a custom type, using the same paired read adapter oligonucleotides described by Bentley et al., (2008))<sup>4</sup> were prepared from the ChIP and Input DNAs on an automated system (Apollo 342, Wafergen Biosystems/Takara). After a final PCR amplification step, the resulting DNA libraries were quantified and sequenced on Illumina's NextSeq 500 (75 nt reads, single end). Reads were aligned to the mouse genome (mm10) using the BWA algorithm (default settings)<sup>5</sup>. Duplicate reads were removed and only uniquely mapped reads (mapping quality  $\geq 25$ ) were used for further analysis. Alignments were extended in silico at their 3'-ends to a length of 200 bp, which is the average genomic fragment length in the size-selected library, and assigned to 32-nt bins along the genome. The resulting histograms (genomic "signal maps") were stored in bigWig files. Peak locations were determined using the MACS algorithm (v2.1.0) with a cutoff of  $p\text{-value} = 1e\text{-}7^6$ . Peaks that were on the ENCODE blacklist of known false ChIP-Seq peaks were removed. Signal maps and peak locations were used as input data to Active Motifs proprietary analysis program, which creates Excel tables containing detailed information on sample comparison, peak metrics, peak locations and gene annotations.

## REFERENCES

1. Tao J, Zhang R, Singh S, et al. Targeting beta-catenin in hepatocellular cancers induced by coexpression of mutant beta-catenin and K-Ras in mice. *Hepatology* 2017;65:1581-1599.
2. Fan B, Malato Y, Calvisi DF, et al. Cholangiocarcinomas can originate from hepatocytes in mice. *J Clin Invest* 2012;122:2911-5.

3. Wang J, Dong M, Xu Z, et al. Notch2 controls hepatocyte-derived cholangiocarcinoma formation in mice. *Oncogene* 2018;37:3229-3242.
4. Bentley DR, Balasubramanian S, Swerdlow HP, et al. Accurate whole human genome sequencing using reversible terminator chemistry. *Nature* 2008;456:53-9.
5. Li H, Durbin R. Fast and accurate short read alignment with Burrows-Wheeler transform. *Bioinformatics* 2009;25:1754-60.
6. Zhang Y, Liu T, Meyer CA, et al. Model-based analysis of ChIP-Seq (MACS). *Genome Biol* 2008;9:R137.

Journal Pre-proof

## 2. SUPPLEMENTARY TABLES

**Table S1: Summary of Patients with PSC and NASH used in the study.**

| Patient Record Number | Age | Sex | SOX9   | pAKT S473 | YAP    | Hepatocyte DNMT1 |        | Disease                                                 |
|-----------------------|-----|-----|--------|-----------|--------|------------------|--------|---------------------------------------------------------|
|                       |     |     |        |           |        | C                | N      |                                                         |
| PHR17-187             | 44  | F   | <20%   | NEG       | 20-50% | 100%             | NEG    | PSC                                                     |
| PHR17-315             | 39  | M   | NEG    | NEG       | <20%   | 100%             | NEG    | PSC                                                     |
| PHR17-318             | 32  | M   | 20-50% | NEG       | <20%   | 50%              | 20-50% | PSC                                                     |
| PHR17-340             | 47  | F   | 20-50% | <20%      | 20-50% | 100%             | 20-50% | PSC                                                     |
| PHR17-471             | 44  | F   | <20%   | <20%      | NEG    | 100%             | <20%   | PSC                                                     |
| PHS18-35              | 35  | M   | <20%   | <20%      | NEG    | 0%               | NEG    | PSC                                                     |
| PHR19-64              | 24  | M   | <20%   | 20-50%    | 20-50% | 100%             | <20%   | PSC                                                     |
| PHR19-67              | 32  | F   | NEG    | NEG       | <20%   |                  |        | PSC                                                     |
| PHR19-74              | 50  | M   | <20%   | 20-50%    | <20%   | 100%             | <20%   | PSC                                                     |
| PHR19-80              | 61  | F   | NEG    | 20-50%    | <20%   | 100%             | NEG    | PSC                                                     |
| PHR16-107             | 67  | M   | <20%   | <20%      | <20%   | 0%               | 0      | NASH                                                    |
| PHR17-50              | 73  | F   | <20%   | NEG       | <20%   | 0%               | NEG    | NASH                                                    |
| PHR17-114             | 53  | F   | 20-50% | 20-50%    | NEG    |                  |        | NASH                                                    |
| PHR17-235             | 63  | M   | 20-50% | 20-50%    | NEG    | 0%               | NEG    | NASH                                                    |
| PHR17-238             | 65  | M   | <20%   | 20-50%    | NEG    | 50%              | NEG    | NASH                                                    |
| PHR17-247             | 61  | M   | <20%   | NEG       | <20%   |                  |        | NASH                                                    |
| PHR17-299             | 56  | F   | <20%   | <20%      | <20%   | <20%             | 0      | NASH                                                    |
| PHR18-25              | 68  | F   | 20-50% | 20-50%    | <20%   | 50%              | <20%   | NASH                                                    |
| PHR18-219             | 62  | F   | <20%   | NEG       | <20%   | <20%             | <20%   | NASH                                                    |
| PHR19-107             | 78  | F   | <20%   | <20%      | <20%   | 100%             | NEG    | NASH                                                    |
| NHL1029               |     |     | NEG    | NA        | NEG    |                  |        | Healthy control liver                                   |
| 16-5566               | 54  | F   | NEG    | NEG       | NEG    |                  |        | Healthy control liver (underlying colon adenocarcinoma) |
| 12-9718               | 60  | M   | NEG    | NEG       | NEG    |                  |        | Healthy control liver (underlying colon adenocarcinoma) |

|             |    |   |     |     |        |   |     |                                                         |
|-------------|----|---|-----|-----|--------|---|-----|---------------------------------------------------------|
| 17-9693     | 49 | F | NEG | NEG | NEG    |   |     | Healthy control liver (underlying colon adenocarcinoma) |
| 13-15397    | 54 | F | NEG | NEG | 20-50% |   |     | Healthy control liver (underlying colon adenocarcinoma) |
| 14-2191     | 36 | M | NEG | NEG | NEG    |   |     | Healthy control liver (underlying colon adenocarcinoma) |
| PHS18-34295 |    |   |     |     |        | 0 | NEG | Healthy control liver                                   |
| PHS18-11592 |    |   |     |     |        | 0 | NEG | Healthy control liver                                   |
| PHS18-5904  |    |   |     |     |        | 0 | NEG | Healthy control liver                                   |
| PHS16-40535 |    |   |     |     |        | 0 | NEG | Healthy control liver                                   |
| PHS16-32066 |    |   |     |     |        | 0 | NEG | Healthy control liver                                   |

**Abbreviations:** C-cytoplasmic; N- nuclear; PSC- Primary sclerosing cholangitis; NASH- Non alcoholic steatohepatitis

Journal Pre-proof



**Table S2: Antibody List used in the study****Primary Antibodies:**

| Target                  | Species | Dilution                   | Source                                          | Catalog Number |
|-------------------------|---------|----------------------------|-------------------------------------------------|----------------|
| HA-tag                  | Mouse   | 1:50 (IHC)                 | Cell Signaling                                  | CS2367         |
| MYC-tag                 | Rabbit  | 1:100 (IHC)                | Maine Medical Center Research Institute (mmcri) | Vli01          |
| Pan-CYTOKERATIN (panCK) | Rabbit  | 1:200 (IHC)                | Dako                                            | Z0622          |
| p-AKT                   | Rabbit  | 1:100 (IHC)                | Cell Signaling                                  | CS4060         |
| SOX9                    | Rabbit  | 1:200 (IF)<br>1:2000 (IHC) | EMD Millipore                                   | Ab5535         |
| YAP1                    | Rabbit  | 1:100 (IF and IHC)         | Cell Signaling                                  | CS14074        |
| HNF4 $\alpha$           | Rabbit  | 1:100 (IHC)                | Cell Signaling                                  | CS3113         |
| PCNA                    | Mouse   | 1:200 (IF)                 | Santa Cruz                                      | sc-56          |
| CK19                    | Rat     | 1:10 (IF)                  | DSHB                                            | TROMA III      |
| DNMT1                   | Rabbit  | 1:100 (IHC)                | Abcam                                           | ab188453       |

**Secondary Antibodies:**

| Secondary Antibody                           | Species | Source        | Catalog Number |
|----------------------------------------------|---------|---------------|----------------|
| Donkey anti-Rabbit IgG Biotin                | Donkey  | EMD Millipore | AP182B         |
| Goat anti-Mouse IgG (H+L) Biotin             | Goat    | EMD Millipore | AP181B         |
| Alexa-Fluor 555 Donkey anti-Rabbit IgG (H+L) | Donkey  | Invitrogen    | A31572         |
| Alexa-Fluor 488 Donkey anti-Rat IgG (H+L)    | Donkey  | Invitrogen    | A21208         |
| Alexa-Fluor 647 Goat anti-Mouse IgG (H+L)    | Goat    | Invitrogen    | A21236         |

**Table S3: List of 200 genes used to estimate the genetic identity of *Akt-NICD-ICC* transcriptome with large clinical ICC cohort by Nearest Template Prediction assay**

| Number | Gene    |
|--------|---------|
| 1      | TAGLN2  |
| 2      | COL4A1  |
| 3      | SPP1    |
| 4      | CCND1   |
| 5      | COL4A2  |
| 6      | NRARP   |
| 7      | ENC1    |
| 8      | OSMR    |
| 9      | KRT8    |
| 10     | MKI67   |
| 11     | ANXA2   |
| 12     | ADCY5   |
| 13     | PXDN    |
| 14     | PODXL   |
| 15     | TRIM47  |
| 16     | DDR1    |
| 17     | SOX9    |
| 18     | SPON1   |
| 19     | LBH     |
| 20     | FSTL1   |
| 21     | ANXA5   |
| 22     | TPM4    |
| 23     | SOX4    |
| 24     | FLNA    |
| 25     | B4GALT6 |
| 26     | ELN     |
| 27     | S100A11 |
| 28     | ARL4C   |
| 29     | CELSR2  |
| 30     | KRT18   |
| 31     | CD9     |

|    |          |
|----|----------|
| 32 | VCAM1    |
| 33 | SLCO3A1  |
| 34 | ADAMTS1  |
| 35 | LAMA5    |
| 36 | TUBA1A   |
| 37 | CSRP1    |
| 38 | TOP2A    |
| 39 | FAR1     |
| 40 | FADS3    |
| 41 | EIF2AK3  |
| 42 | TRIB2    |
| 43 | SYNPO    |
| 44 | DCDC2    |
| 45 | TTYH1    |
| 46 | CD63     |
| 47 | DKK3     |
| 48 | FAM118A  |
| 49 | SH3PXD2B |
| 50 | JAG1     |
| 51 | CLASP1   |
| 52 | PTPN13   |
| 53 | VIM      |
| 54 | TGM2     |
| 55 | EHF      |
| 56 | PTK7     |
| 57 | SCARA3   |
| 58 | BCAM     |
| 59 | BICC1    |
| 60 | CKB      |
| 61 | LMNA     |
| 62 | PRC1     |
| 63 | MARCKS   |
| 64 | MCAM     |
| 65 | BMP6     |
| 66 | ENAH     |
| 67 | STMN1    |
| 68 | PFKFB4   |
| 69 | RHBDF1   |
| 70 | MAP1B    |

|     |          |
|-----|----------|
| 71  | ADGRG1   |
| 72  | SRC      |
| 73  | MAP2     |
| 74  | ANLN     |
| 75  | VILL     |
| 76  | HEYL     |
| 77  | WLS      |
| 78  | SMTNL2   |
| 79  | GAS6     |
| 80  | ELF3     |
| 81  | ACTN1    |
| 82  | PHLDA3   |
| 83  | CENPF    |
| 84  | PPP1R9B  |
| 85  | MGAT5    |
| 86  | GPC6     |
| 87  | SERPINB6 |
| 88  | ARHGEF10 |
| 89  | VSIG10   |
| 90  | COL1A1   |
| 91  | GLS      |
| 92  | ZNF703   |
| 93  | AGPAT1   |
| 94  | RACGAP1  |
| 95  | CDKN1A   |
| 96  | CDH15    |
| 97  | SCD      |
| 98  | LIG1     |
| 99  | LTBP1    |
| 100 | INHBB    |
| 101 | CELA1    |
| 102 | CYP4F12  |
| 103 | FAM210A  |
| 104 | CYP2D6   |
| 105 | CDC14B   |
| 106 | GNA12    |
| 107 | RNF103   |
| 108 | FECH     |
| 109 | SUCNR1   |

|     |            |
|-----|------------|
| 110 | AK3        |
| 111 | IPMK       |
| 112 | SULT1B1    |
| 113 | PDK2       |
| 114 | RETSAT     |
| 115 | FBXO8      |
| 116 | STAT5B     |
| 117 | CAT        |
| 118 | ERBB3      |
| 119 | SLC25A42   |
| 120 | SFXN5      |
| 121 | PGM2       |
| 122 | C16orf70   |
| 123 | MN1        |
| 124 | TYMP       |
| 125 | GNS        |
| 126 | CHUK       |
| 127 | DHRS3      |
| 128 | CMBL       |
| 129 | TSC1       |
| 130 | SELENBP1   |
| 131 | RNF152     |
| 132 | MOCS1      |
| 133 | ABCD3      |
| 134 | NFIX       |
| 135 | SLC2A2     |
| 136 | NDST1      |
| 137 | RMND5A     |
| 138 | CHPT1      |
| 139 | FOXN3      |
| 140 | ETFDH      |
| 141 | HLF        |
| 142 | GGACT      |
| 143 | DYRK2      |
| 144 | AL049629.2 |
| 145 | ABCG8      |
| 146 | IDH3B      |
| 147 | HSD17B11   |
| 148 | PXMP4      |

|     |          |
|-----|----------|
| 149 | AGTR1    |
| 150 | HSD11B1  |
| 151 | INSIG2   |
| 152 | KHNYN    |
| 153 | ZCCHC24  |
| 154 | CA1      |
| 155 | PNPLA8   |
| 156 | SNX29    |
| 157 | CYB5R3   |
| 158 | ALDH5A1  |
| 159 | SDR42E1  |
| 160 | NQO2     |
| 161 | ACBD5    |
| 162 | KHK      |
| 163 | OPA1     |
| 164 | DONSON   |
| 165 | NAA60    |
| 166 | TSPAN12  |
| 167 | NPC1     |
| 168 | FTCD     |
| 169 | SEPHS2   |
| 170 | UQCRB    |
| 171 | ZFAND6   |
| 172 | SCAP     |
| 173 | PTTG1IP  |
| 174 | MCC      |
| 175 | PCTP     |
| 176 | CYP4F8   |
| 177 | RUFY3    |
| 178 | ECM1     |
| 179 | PRKD3    |
| 180 | PPARGC1B |
| 181 | SASH1    |
| 182 | DENND4A  |
| 183 | FAM13A   |
| 184 | HMGCS2   |
| 185 | HYKK     |
| 186 | SDHC     |
| 187 | CA14     |

|     |         |
|-----|---------|
| 188 | ACOT12  |
| 189 | RILP    |
| 190 | UGT1A1  |
| 191 | CLDN1   |
| 192 | NR1H4   |
| 193 | ISOC1   |
| 194 | NDUFA10 |
| 195 | ACSL1   |
| 196 | PAQR7   |
| 197 | RNF125  |
| 198 | PBLD    |
| 199 | SLC6A9  |
| 200 | MLXIPL  |

Journal Pre-proof

**Table S4: List of 169 overlapped genes by integration of DNMT1 ChIP-seq and down-regulated in transcriptome profile**

| Number | Gene    |
|--------|---------|
| 1      | GM4980  |
| 2      | DENND4A |
| 3      | ACAD11  |
| 4      | INCA1   |
| 5      | ARRDC3  |
| 6      | PTTG1IP |
| 7      | SMIM13  |
| 8      | ACO1    |
| 9      | AK2     |
| 10     | APBA2   |
| 11     | ATP5A1  |
| 12     | ZFP36L1 |
| 13     | C2      |
| 14     | CHUK    |
| 15     | PLK3    |
| 16     | COX5A   |
| 17     | CREM    |
| 18     | CYP26A1 |
| 19     | DCT     |
| 20     | DYRK1B  |
| 21     | EFNA3   |
| 22     | EVI5    |
| 23     | F8      |
| 24     | FTL1    |
| 25     | GAS1    |
| 26     | GATA4   |
| 27     | GCGR    |
| 28     | GCH1    |
| 29     | GOT2    |
| 30     | AES     |
| 31     | H2-KE6  |
| 32     | FOXQ1   |
| 33     | HHEX    |
| 34     | HLX     |



|    |               |
|----|---------------|
| 35 | IGFBP4        |
| 36 | INSR          |
| 37 | IRS1          |
| 38 | MAFB          |
| 39 | LHX2          |
| 40 | ELOVL6        |
| 41 | SLC8B1        |
| 42 | AMACR         |
| 43 | CRELD1        |
| 44 | NPAS2         |
| 45 | NPC1          |
| 46 | NUMB          |
| 47 | P2RY2         |
| 48 | PDE9A         |
| 49 | PITX3         |
| 50 | RORA          |
| 51 | SEMA6C        |
| 52 | SOD1          |
| 53 | CAMKK2        |
| 54 | SLC25A38      |
| 55 | SNED1         |
| 56 | SDC4          |
| 57 | SPRN          |
| 58 | SH3BGRL2      |
| 59 | ALDH4A1       |
| 60 | SLC6A6        |
| 61 | CECR5         |
| 62 | TCP11L2       |
| 63 | UGP2          |
| 64 | GLTPD2        |
| 65 | L2HGDH        |
| 66 | VWA8          |
| 67 | DLGAP1        |
| 68 | LIMS2         |
| 69 | ZADH2         |
| 70 | ATRNL1        |
| 71 | RNF103        |
| 72 | C130074G19RIK |
| 73 | ZFP36         |

|     |           |
|-----|-----------|
| 74  | SLC25A25  |
| 75  | PDK1      |
| 76  | NUDT6     |
| 77  | CREBL2    |
| 78  | TUFM      |
| 79  | ZBTB44    |
| 80  | SH3BP5    |
| 81  | GABBR2    |
| 82  | GPRIN3    |
| 83  | BAHCC1    |
| 84  | GPHN      |
| 85  | GPR157    |
| 86  | BC024139  |
| 87  | SLC25A10  |
| 88  | MRPL39    |
| 89  | ABCA8B    |
| 90  | ABCC6     |
| 91  | MARVELD1  |
| 92  | ULK2      |
| 93  | VPS13C    |
| 94  | SLC35E2   |
| 95  | DENND5B   |
| 96  | ATP11C    |
| 97  | MIA3      |
| 98  | NR1D2     |
| 99  | TLCD2     |
| 100 | RBM33     |
| 101 | DRC1      |
| 102 | PDP2      |
| 103 | CREG1     |
| 104 | MN1       |
| 105 | SHF       |
| 106 | LRP3      |
| 107 | SLC25A13  |
| 108 | TNK2      |
| 109 | ACAA2     |
| 110 | GNPNAT1   |
| 111 | EPB4.1L4B |
| 112 | ABCB10    |

|     |               |
|-----|---------------|
| 113 | NGLY1         |
| 114 | GM6484        |
| 115 | TSC1          |
| 116 | ASB2          |
| 117 | EEFSEC        |
| 118 | ABHD6         |
| 119 | 1110001J03RIK |
| 120 | AAED1         |
| 121 | NDUFB9        |
| 122 | PYURF         |
| 123 | FIGNL2        |
| 124 | HINT3         |
| 125 | ACADSB        |
| 126 | LONP2         |
| 127 | PXDC1         |
| 128 | NDUFA6        |
| 129 | PNPLA8        |
| 130 | MMD           |
| 131 | EEPD1         |
| 132 | RNF125        |
| 133 | DGAT2         |
| 134 | ATG101        |
| 135 | GCSH          |
| 136 | 0610030E20RIK |
| 137 | PCYT2         |
| 138 | ELOVL5        |
| 139 | DDAH1         |
| 140 | HIST1H4H      |
| 141 | CHN2          |
| 142 | MPC2          |
| 143 | MIPEP         |
| 144 | CABYR         |
| 145 | ARHGAP42      |
| 146 | AMDHD1        |
| 147 | PITPNC1       |
| 148 | OSGIN1        |
| 149 | LRPPRC        |
| 150 | MBLAC2        |
| 151 | PMPCB         |

|     |               |
|-----|---------------|
| 152 | SLC25A16      |
| 153 | RHOX13        |
| 154 | NMNAT3        |
| 155 | GBE1          |
| 156 | TBC1D30       |
| 157 | TBC1D30       |
| 158 | ARL5A         |
| 159 | 1700001C19RIK |
| 160 | FGGY          |
| 161 | KLHL24        |
| 162 | DOCK8         |
| 163 | GRHPR         |
| 164 | MND1          |
| 165 | OCEL1         |
| 166 | 9430038I01RIK |
| 167 | CML2          |
| 168 | PHLPP1        |
| 169 | RDH10         |

Journal Pre-proof

**Table S5: 320 upstream regulators for identified 169 overlapped genes (Table S4)  
predicted by IPA-URA tool**

| Upstream Regulator           | Molecule Type                   | p-value of overlap |
|------------------------------|---------------------------------|--------------------|
| methylprednisolone           | chemical drug                   | 4.36E-07           |
| INSR                         | kinase                          | 7.17E-06           |
| moxonidine                   | chemical drug                   | 1.07E-04           |
| CPT1B                        | enzyme                          | 1.15E-04           |
| mono-(2-ethylhexyl)phthalate | chemical toxicant               | 1.37E-04           |
| D-glucose                    | chemical - endogenous mammalian | 1.98E-04           |
| IGF2BP2                      | translation regulator           | 2.75E-04           |
| ANGPTL7                      | other                           | 2.75E-04           |
| methotrexate                 | chemical drug                   | 3.22E-04           |
| peoniflorin                  | chemical drug                   | 3.27E-04           |
| APP                          | other                           | 3.71E-04           |
| TP53                         | transcription regulator         | 4.07E-04           |
| SMYD1                        | transcription regulator         | 4.71E-04           |
| tert-butyl-hydroquinone      | chemical reagent                | 4.91E-04           |
| LONP1                        | peptidase                       | 5.15E-04           |
| PTPN1                        | phosphatase                     | 5.43E-04           |
| isobutylmethylxanthine       | chemical toxicant               | 7.65E-04           |
| NKX2-2-AS1                   | other                           | 8.09E-04           |
| USP28                        | peptidase                       | 9.51E-04           |
| LDHB                         | enzyme                          | 9.51E-04           |
| ABCB7                        | transporter                     | 9.51E-04           |
| INS                          | other                           | 9.93E-04           |
| metribolone                  | chemical reagent                | 1.03E-03           |
| IGF2                         | growth factor                   | 1.12E-03           |
| CEBPA                        | transcription regulator         | 1.19E-03           |
| DIO3                         | enzyme                          | 1.23E-03           |
| Ck2                          | complex                         | 1.62E-03           |
| IGF2R                        | transmembrane receptor          | 2.01E-03           |
| CLOCK                        | transcription regulator         | 2.06E-03           |

|                                              |                                 |          |
|----------------------------------------------|---------------------------------|----------|
| GRB10                                        | other                           | 2.45E-03 |
| sphingomyelin                                | chemical - endogenous mammalian | 2.45E-03 |
| GCG                                          | other                           | 2.53E-03 |
| PNPLA2                                       | enzyme                          | 2.64E-03 |
| beraprost                                    | chemical drug                   | 2.92E-03 |
| NFU1                                         | other                           | 2.95E-03 |
| NUPR1                                        | transcription regulator         | 2.98E-03 |
| WNT3A                                        | cytokine                        | 3.00E-03 |
| UQCC3                                        | other                           | 3.12E-03 |
| GNAQ                                         | enzyme                          | 3.51E-03 |
| beta-carotene                                | chemical - endogenous mammalian | 3.59E-03 |
| streptozocin                                 | chemical drug                   | 3.78E-03 |
| elaidic acid                                 | chemical - endogenous mammalian | 3.81E-03 |
| pirinixic acid                               | chemical toxicant               | 3.96E-03 |
| Cd2+                                         | chemical toxicant               | 3.99E-03 |
| DSCAM                                        | other                           | 4.11E-03 |
| FFAR4                                        | G-protein coupled receptor      | 4.59E-03 |
| CG                                           | complex                         | 5.37E-03 |
| topiramate                                   | chemical drug                   | 5.69E-03 |
| PRKAG3                                       | kinase                          | 5.70E-03 |
| miR-124-3p (and other miRNAs w/seed AAGGCAC) | mature microRNA                 | 5.84E-03 |
| TO-901317                                    | chemical reagent                | 6.20E-03 |
| leukotriene D4                               | chemical - endogenous mammalian | 6.31E-03 |
| HNF1A                                        | transcription regulator         | 6.46E-03 |
| raloxifene                                   | chemical drug                   | 6.60E-03 |
| IGFBP2                                       | other                           | 6.64E-03 |
| rosiglitazone                                | chemical drug                   | 6.80E-03 |
| RDH5                                         | enzyme                          | 6.83E-03 |
| KLHL13                                       | other                           | 6.83E-03 |
| KLHL9                                        | other                           | 6.83E-03 |
| Gm13570/Gm4984                               | other                           | 6.83E-03 |
| JAKMIP1                                      | other                           | 6.83E-03 |

|                                                    |                                     |          |
|----------------------------------------------------|-------------------------------------|----------|
| PISD                                               | enzyme                              | 6.83E-03 |
| GRB14                                              | other                               | 6.83E-03 |
| SNX5                                               | transporter                         | 6.83E-03 |
| M6PR                                               | transporter                         | 6.83E-03 |
| FAM13A                                             | other                               | 6.83E-03 |
| diacetylbis(4-methylthiosemicarbazonato)copper(II) | chemical reagent                    | 6.83E-03 |
| MID-1                                              | chemical reagent                    | 6.83E-03 |
| myrcene                                            | chemical - endogenous non-mammalian | 6.83E-03 |
| cineole                                            | chemical drug                       | 6.83E-03 |
| FOXA2                                              | transcription regulator             | 6.83E-03 |
| dexamethasone                                      | chemical drug                       | 6.93E-03 |
| ZC3H12A                                            | enzyme                              | 7.09E-03 |
| LEP                                                | growth factor                       | 7.33E-03 |
| PHLPP1                                             | enzyme                              | 7.34E-03 |
| DBP                                                | transcription regulator             | 7.34E-03 |
| GSK3A                                              | kinase                              | 7.34E-03 |
| PRKCG                                              | kinase                              | 7.67E-03 |
| RPA1                                               | other                               | 8.12E-03 |
| POR                                                | enzyme                              | 8.14E-03 |
| GnRH analog                                        | biologic drug                       | 8.17E-03 |
| Esrra                                              | transcription regulator             | 8.28E-03 |
| HOXA9                                              | transcription regulator             | 8.33E-03 |
| IGF1                                               | growth factor                       | 8.48E-03 |
| MAP4K4                                             | kinase                              | 8.78E-03 |
| MECP2                                              | transcription regulator             | 9.29E-03 |
| PLN                                                | transporter                         | 9.59E-03 |
| TRIM2                                              | enzyme                              | 9.78E-03 |
| fenofibrate                                        | chemical drug                       | 1.04E-02 |
| sirolimus                                          | chemical drug                       | 1.06E-02 |
| TSPYL5                                             | other                               | 1.07E-02 |
| MGP                                                | other                               | 1.07E-02 |
| SULT1E1                                            | enzyme                              | 1.07E-02 |
| diallyl trisulfide                                 | chemical - endogenous non-mammalian | 1.07E-02 |

|                        |                                   |          |
|------------------------|-----------------------------------|----------|
| BACH1                  | transcription regulator           | 1.09E-02 |
| IL4                    | cytokine                          | 1.09E-02 |
| cyclic AMP             | chemical - endogenous mammalian   | 1.09E-02 |
| tributyltin            | chemical reagent                  | 1.13E-02 |
| TINCR                  | other                             | 1.16E-02 |
| Z-LLL-CHO              | chemical - protease inhibitor     | 1.18E-02 |
| ESR2                   | ligand-dependent nuclear receptor | 1.20E-02 |
| mir-133                | microRNA                          | 1.22E-02 |
| HNF4A                  | transcription regulator           | 1.24E-02 |
| CD3                    | complex                           | 1.25E-02 |
| COMMD1                 | transporter                       | 1.25E-02 |
| IRS1                   | enzyme                            | 1.29E-02 |
| GNA14                  | enzyme                            | 1.32E-02 |
| CD 437                 | chemical drug                     | 1.34E-02 |
| ACLY                   | enzyme                            | 1.35E-02 |
| SRD5A1                 | enzyme                            | 1.35E-02 |
| SD 0006                | chemical reagent                  | 1.36E-02 |
| LINC00667              | other                             | 1.36E-02 |
| STARD4                 | transporter                       | 1.36E-02 |
| SOCS7                  | other                             | 1.36E-02 |
| USP46                  | peptidase                         | 1.36E-02 |
| PTPase                 | group                             | 1.36E-02 |
| TCDD-AHR               | complex                           | 1.36E-02 |
| FBXW8                  | enzyme                            | 1.36E-02 |
| beta-apo-14'-carotenal | chemical - endogenous mammalian   | 1.36E-02 |
| NKIRAS1                | enzyme                            | 1.36E-02 |
| ME1                    | enzyme                            | 1.36E-02 |
| GABRG2                 | ion channel                       | 1.36E-02 |
| DNAJB1                 | transcription regulator           | 1.36E-02 |
| bavachalcone           | chemical reagent                  | 1.36E-02 |
| primaquine             | chemical drug                     | 1.36E-02 |
| milrinone              | chemical drug                     | 1.36E-02 |
| talarozole             | chemical drug                     | 1.36E-02 |



|                                             |                                     |          |
|---------------------------------------------|-------------------------------------|----------|
| glipizide                                   | chemical drug                       | 1.36E-02 |
| apo-13-lycopenone                           | chemical reagent                    | 1.36E-02 |
| apo-15-lycopenal                            | chemical reagent                    | 1.36E-02 |
| ZBTB7B                                      | transcription regulator             | 1.37E-02 |
| CD300LF                                     | other                               | 1.45E-02 |
| NR4A1                                       | ligand-dependent nuclear receptor   | 1.57E-02 |
| miR-223-3p (miRNAs w/seed GUCAGUU)          | mature microRNA                     | 1.67E-02 |
| CCL5                                        | cytokine                            | 1.69E-02 |
| miR-7a-5p (and other miRNAs w/seed GGAAGAC) | mature microRNA                     | 1.78E-02 |
| N(G)-monomethyl-D-arginine                  | chemical - endogenous mammalian     | 1.78E-02 |
| FOXO1                                       | transcription regulator             | 1.79E-02 |
| IFRD1                                       | other                               | 1.89E-02 |
| PSEN1                                       | peptidase                           | 1.95E-02 |
| beta-estradiol                              | chemical - endogenous mammalian     | 1.97E-02 |
| ALDH1A2                                     | enzyme                              | 2.01E-02 |
| NCOA4                                       | transcription regulator             | 2.01E-02 |
| IRS                                         | group                               | 2.03E-02 |
| TAF3                                        | transcription regulator             | 2.03E-02 |
| DNAJA2                                      | enzyme                              | 2.03E-02 |
| STARD5                                      | transporter                         | 2.03E-02 |
| dapagliflozin                               | chemical drug                       | 2.03E-02 |
| PHYH                                        | enzyme                              | 2.03E-02 |
| aurora kinase inhibitor III                 | chemical - kinase inhibitor         | 2.03E-02 |
| FTMT                                        | enzyme                              | 2.03E-02 |
| AFDN                                        | other                               | 2.03E-02 |
| NEU1                                        | enzyme                              | 2.03E-02 |
| RDH16                                       | enzyme                              | 2.03E-02 |
| BRF110                                      | chemical reagent                    | 2.03E-02 |
| CDD450                                      | chemical drug                       | 2.03E-02 |
| actinomycin                                 | chemical - endogenous non-mammalian | 2.03E-02 |
| quinine                                     | chemical drug                       | 2.03E-02 |

|                 |                                      |          |
|-----------------|--------------------------------------|----------|
| glyphosate      | chemical toxicant                    | 2.03E-02 |
| TLE3            | other                                | 2.11E-02 |
| AHCY            | enzyme                               | 2.13E-02 |
| SCAP            | other                                | 2.24E-02 |
| cinnamaldehyde  | chemical toxicant                    | 2.24E-02 |
| bardoxolone     | chemical drug                        | 2.25E-02 |
| Insulin         | group                                | 2.27E-02 |
| PTGER4          | G-protein coupled receptor           | 2.28E-02 |
| RYR1            | ion channel                          | 2.38E-02 |
| CA9             | enzyme                               | 2.38E-02 |
| daunorubicin    | chemical drug                        | 2.38E-02 |
| TRAP1           | enzyme                               | 2.45E-02 |
| CD38            | enzyme                               | 2.47E-02 |
| Stat3-Stat3     | complex                              | 2.51E-02 |
| CEBPB           | transcription regulator              | 2.51E-02 |
| hydrocortisone  | chemical - endogenous<br>mammalian   | 2.52E-02 |
| EGLN            | group                                | 2.52E-02 |
| ST1926          | chemical drug                        | 2.52E-02 |
| TSC2            | other                                | 2.57E-02 |
| Hbb-b1          | transporter                          | 2.59E-02 |
| GNB2            | enzyme                               | 2.64E-02 |
| nicotinic acid  | chemical - endogenous<br>mammalian   | 2.64E-02 |
| RARG            | ligand-dependent nuclear<br>receptor | 2.66E-02 |
| SKA3            | other                                | 2.70E-02 |
| GPR55           | G-protein coupled receptor           | 2.70E-02 |
| tyrosine kinase | group                                | 2.70E-02 |
| MCU             | ion channel                          | 2.70E-02 |
| CCDC3           | other                                | 2.70E-02 |
| FDX2            | transporter                          | 2.70E-02 |
| OPN3            | G-protein coupled receptor           | 2.70E-02 |
| MITF-p300/CBP   | complex                              | 2.70E-02 |
| PX 478          | chemical drug                        | 2.70E-02 |
| GH2             | other                                | 2.70E-02 |

|                                 |                                 |          |
|---------------------------------|---------------------------------|----------|
| FGD5-AS1                        | other                           | 2.70E-02 |
| mir-32                          | microRNA                        | 2.70E-02 |
| FDXR                            | enzyme                          | 2.70E-02 |
| HAP1                            | other                           | 2.70E-02 |
| AK4                             | kinase                          | 2.70E-02 |
| diamide                         | chemical reagent                | 2.70E-02 |
| 9-cis-retinal                   | chemical - endogenous mammalian | 2.70E-02 |
| thymeleatoxin                   | chemical toxicant               | 2.70E-02 |
| MBTD1                           | other                           | 2.77E-02 |
| Immunoglobulin                  | complex                         | 2.78E-02 |
| DYSF                            | other                           | 2.81E-02 |
| methamphetamine                 | chemical drug                   | 2.81E-02 |
| lipopolysaccharide              | chemical drug                   | 2.88E-02 |
| PRKN                            | enzyme                          | 2.89E-02 |
| HDL-cholesterol                 | complex                         | 2.91E-02 |
| CARM1                           | transcription regulator         | 2.91E-02 |
| GNB1                            | enzyme                          | 2.91E-02 |
| BTG2                            | transcription regulator         | 2.91E-02 |
| sucrose                         | chemical - endogenous mammalian | 2.91E-02 |
| HDAC3                           | transcription regulator         | 3.04E-02 |
| ATP7B                           | transporter                     | 3.05E-02 |
| CTF1                            | cytokine                        | 3.05E-02 |
| GLI1                            | transcription regulator         | 3.14E-02 |
| SAMMSON                         | other                           | 3.19E-02 |
| M344                            | chemical reagent                | 3.19E-02 |
| dihydrotestosterone             | chemical - endogenous mammalian | 3.27E-02 |
| N-nitro-L-arginine methyl ester | chemical drug                   | 3.28E-02 |
| propofol                        | chemical drug                   | 3.34E-02 |
| PAX5-ELN                        | fusion gene/product             | 3.34E-02 |
| S-nitrosoglutathione            | chemical toxicant               | 3.34E-02 |
| PSEN2                           | peptidase                       | 3.36E-02 |
| inositol                        | chemical drug                   | 3.37E-02 |
| ginsenoside Re                  | chemical drug                   | 3.37E-02 |

|                                                    |                                 |          |
|----------------------------------------------------|---------------------------------|----------|
| ZC3H10                                             | other                           | 3.37E-02 |
| MPC1                                               | transporter                     | 3.37E-02 |
| ALDH3A2                                            | enzyme                          | 3.37E-02 |
| insulin detemir                                    | biologic drug                   | 3.37E-02 |
| miR-202-3p (and other miRNAs w/seed GAGGUAU)       | mature microRNA                 | 3.37E-02 |
| mir-191                                            | microRNA                        | 3.37E-02 |
| BCAR3                                              | other                           | 3.37E-02 |
| tofogliflozin                                      | chemical drug                   | 3.37E-02 |
| Meis1                                              | transcription regulator         | 3.37E-02 |
| mini-GAGR                                          | chemical reagent                | 3.37E-02 |
| CB-PIC                                             | chemical reagent                | 3.37E-02 |
| chlorine                                           | chemical toxicant               | 3.37E-02 |
| SLC27A2                                            | transporter                     | 3.48E-02 |
| pituitary adenylate cyclase-activating polypeptide | biologic drug                   | 3.48E-02 |
| NGF                                                | growth factor                   | 3.56E-02 |
| trans-hydroxytamoxifen                             | chemical drug                   | 3.57E-02 |
| PPARGC1A                                           | transcription regulator         | 3.59E-02 |
| ethanol                                            | chemical - endogenous mammalian | 3.62E-02 |
| HBA1/HBA2                                          | transporter                     | 3.63E-02 |
| LRP5                                               | transmembrane receptor          | 3.63E-02 |
| ESRRB                                              | transcription regulator         | 3.79E-02 |
| thyroid hormone                                    | chemical - endogenous mammalian | 3.82E-02 |
| uranyl nitrate                                     | chemical toxicant               | 3.88E-02 |
| HNRNPH1                                            | other                           | 3.94E-02 |
| CUL4B                                              | other                           | 3.94E-02 |
| NFIB                                               | transcription regulator         | 3.94E-02 |
| bafilomycin A1                                     | chemical drug                   | 3.94E-02 |
| MTOR                                               | kinase                          | 3.96E-02 |
| SERCA                                              | group                           | 4.03E-02 |
| Cbp/p300-Maf-Nfe2l2                                | complex                         | 4.03E-02 |
| PGRMC2                                             | transporter                     | 4.03E-02 |
| VANGL2                                             | other                           | 4.03E-02 |

|                                            |                                 |          |
|--------------------------------------------|---------------------------------|----------|
| GSK690693                                  | chemical drug                   | 4.03E-02 |
| KCNIP2                                     | transporter                     | 4.03E-02 |
| miR-137-3p (miRNAs w/seed UAUUGCU)         | mature microRNA                 | 4.03E-02 |
| SRPK1                                      | kinase                          | 4.03E-02 |
| NOCT                                       | transcription regulator         | 4.03E-02 |
| CAMK1                                      | kinase                          | 4.03E-02 |
| BARD1                                      | transcription regulator         | 4.03E-02 |
| zonisamide                                 | chemical drug                   | 4.03E-02 |
| GSK2837808A                                | chemical reagent                | 4.03E-02 |
| Z-Leu-Leu-Leu-B(OH) <sub>2</sub>           | chemical reagent                | 4.03E-02 |
| methyllycaconitine                         | chemical toxicant               | 4.03E-02 |
| N-retinylidene-N-retinylethanolamine       | chemical - endogenous mammalian | 4.03E-02 |
| 2,4,5,2',4',5'-hexachlorobiphenyl          | chemical toxicant               | 4.06E-02 |
| IRF4                                       | transcription regulator         | 4.08E-02 |
| topotecan                                  | chemical drug                   | 4.08E-02 |
| doxorubicin                                | chemical drug                   | 4.12E-02 |
| palmitic acid                              | chemical - endogenous mammalian | 4.17E-02 |
| SCD                                        | enzyme                          | 4.22E-02 |
| H2AX                                       | transcription regulator         | 4.26E-02 |
| ADRA1B                                     | G-protein coupled receptor      | 4.26E-02 |
| ADRA1D                                     | G-protein coupled receptor      | 4.26E-02 |
| n-3 fatty acids                            | chemical drug                   | 4.26E-02 |
| SREBF1                                     | transcription regulator         | 4.28E-02 |
| Rxr                                        | group                           | 4.33E-02 |
| SPARC                                      | other                           | 4.33E-02 |
| miR-1-3p (and other miRNAs w/seed GGAAUGU) | mature microRNA                 | 4.35E-02 |
| PAF1                                       | other                           | 4.42E-02 |
| PDX1                                       | transcription regulator         | 4.49E-02 |
| ONECUT1                                    | transcription regulator         | 4.50E-02 |
| Hedgehog                                   | group                           | 4.58E-02 |
| ZNF100                                     | transcription regulator         | 4.68E-02 |
| ZNF85                                      | transcription regulator         | 4.68E-02 |

|                         |                                   |          |
|-------------------------|-----------------------------------|----------|
| ZNF254                  | transcription regulator           | 4.68E-02 |
| RASSF8                  | other                             | 4.68E-02 |
| ZNF431                  | transcription regulator           | 4.68E-02 |
| USP29                   | peptidase                         | 4.68E-02 |
| ACIN1                   | enzyme                            | 4.68E-02 |
| PDE6B                   | enzyme                            | 4.68E-02 |
| COMT                    | enzyme                            | 4.68E-02 |
| RHEB                    | enzyme                            | 4.68E-02 |
| PDE3A                   | enzyme                            | 4.68E-02 |
| ZNF665                  | other                             | 4.68E-02 |
| ZNF528                  | other                             | 4.68E-02 |
| HOXC-AS3                | other                             | 4.68E-02 |
| ZNF43                   | transcription regulator           | 4.68E-02 |
| ZNF429                  | transcription regulator           | 4.68E-02 |
| SORL1                   | transporter                       | 4.68E-02 |
| SENP2                   | peptidase                         | 4.68E-02 |
| GNMT                    | enzyme                            | 4.68E-02 |
| ZNF708                  | other                             | 4.68E-02 |
| thenoyltrifluoroacetone | chemical reagent                  | 4.68E-02 |
| HI-TOPK32               | chemical reagent                  | 4.68E-02 |
| RORC                    | ligand-dependent nuclear receptor | 4.71E-02 |
| RICTOR                  | other                             | 4.79E-02 |
| IL5                     | cytokine                          | 4.91E-02 |
| inosine                 | chemical - endogenous mammalian   | 4.92E-02 |
| MAP2K5                  | kinase                            | 4.92E-02 |
| ADRA1A                  | G-protein coupled receptor        | 4.92E-02 |
| CTBP1                   | enzyme                            | 4.92E-02 |
| cisplatin               | chemical drug                     | 4.93E-02 |
| KMT2D                   | transcription regulator           | 5.00E-02 |
| quercetin               | chemical drug                     | 7.22E-02 |
| acetaminophen           | chemical drug                     | 8.35E-02 |

### 3. Supplementary Figures and Legends

Figure S1

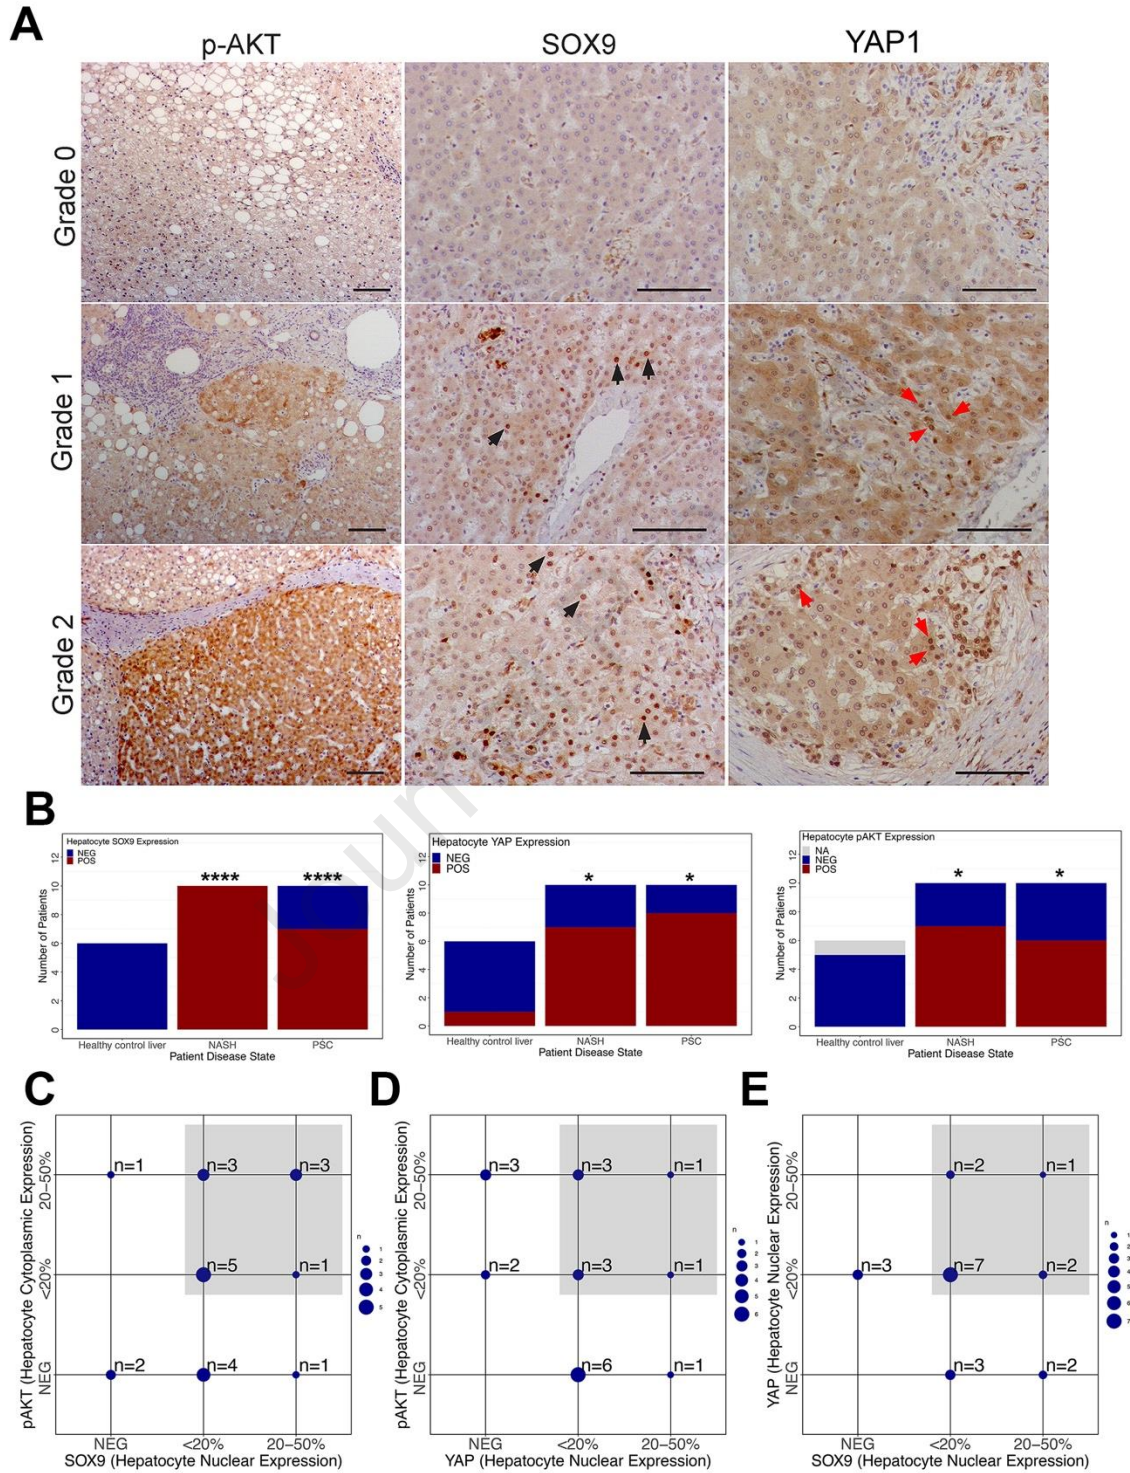

**Figure S1. Activation of p-AKT, YAP1 and SOX9 in human liver diseases with higher risk for the development of ICC.** (A) Representative human liver section images used for arbitrary scoring for p-AKT, SOX9 and YAP1 expression by IHC. Grade 0, no expression; grade 1 < 20%; grade 2 < 50% (Grade 1 and 2 are considered positive). (B) Comparison of the number of patients with positive expression of SOX9, YAP1, or p-AKT in HCs shows an enrichment in positive HCs among PSC and NASH patients vs healthy controls. (C-E) Overlap in the expression of YAP1, SOX9, and p-AKT among patients with PSC and NASH shows most patients have at least 2 of 3 markers upregulated. Scale bars: 100  $\mu$ m. \* $p$ <0.05; \*\*\*\* $p$ < 0.0001.



**Figure S2**

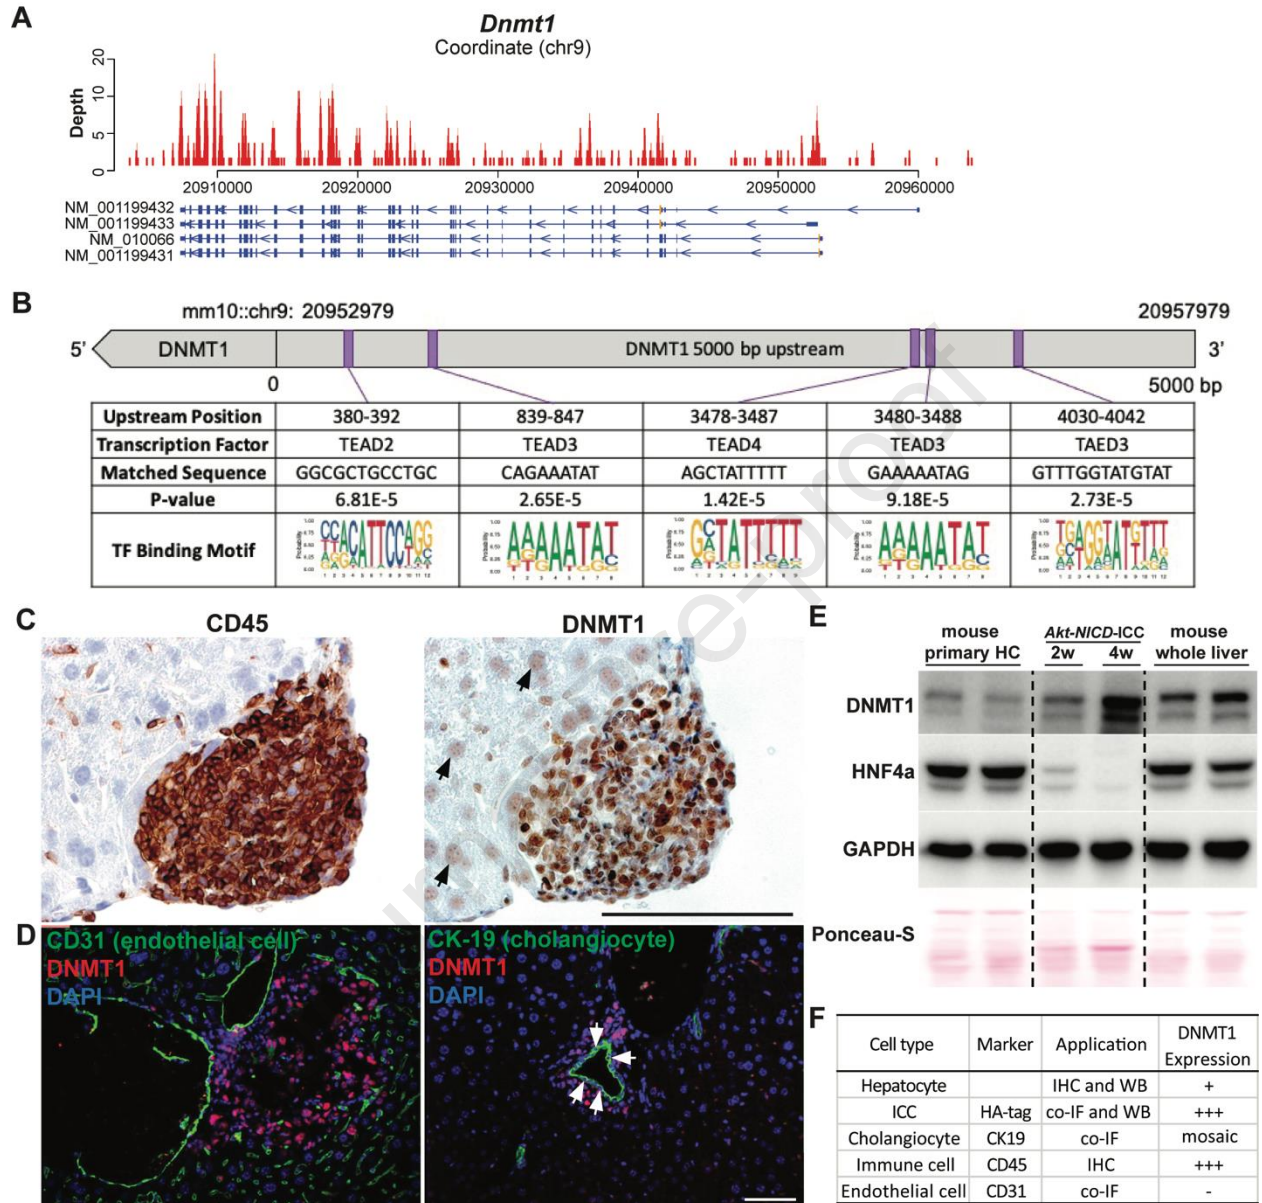

**Figure S2. DNMT1 expression in mouse liver. (A)** ChIP-seq data for TEAD4 binding sites on *Dnmt1* genomic regions are collected from GEO GSM2882182. **(B)** Predicted TEAD2/TEAD3/TEAD4 binding sites located at 5,000 bp upstream from *Dnmt1* transcription start site. **(C)** IHC staining for *Akt-NICD* KO ICC liver at 5 weeks post HDTV1 showing strong DNMT1 expression in CD45<sup>+</sup> immune cells whereas weak expression in HCs (arrows). **(D)** Co-IF showing strong nuclear DNMT1 expression in

subset of CK-19+ cholangiocytes but not in CD31+ endothelial cells in the liver. **(E)** Representative WB from two independent experiment shows weak DNMT1 expression in HNF4a-enriched mouse primary HCs while strong augment of DNMT1 during transformation into ICC cells. **(F)** Table summarizing the DNMT1 expression pattern in diverse cell types in the liver. scale bar: 100 um.

Journal Pre-proof

Figure S3

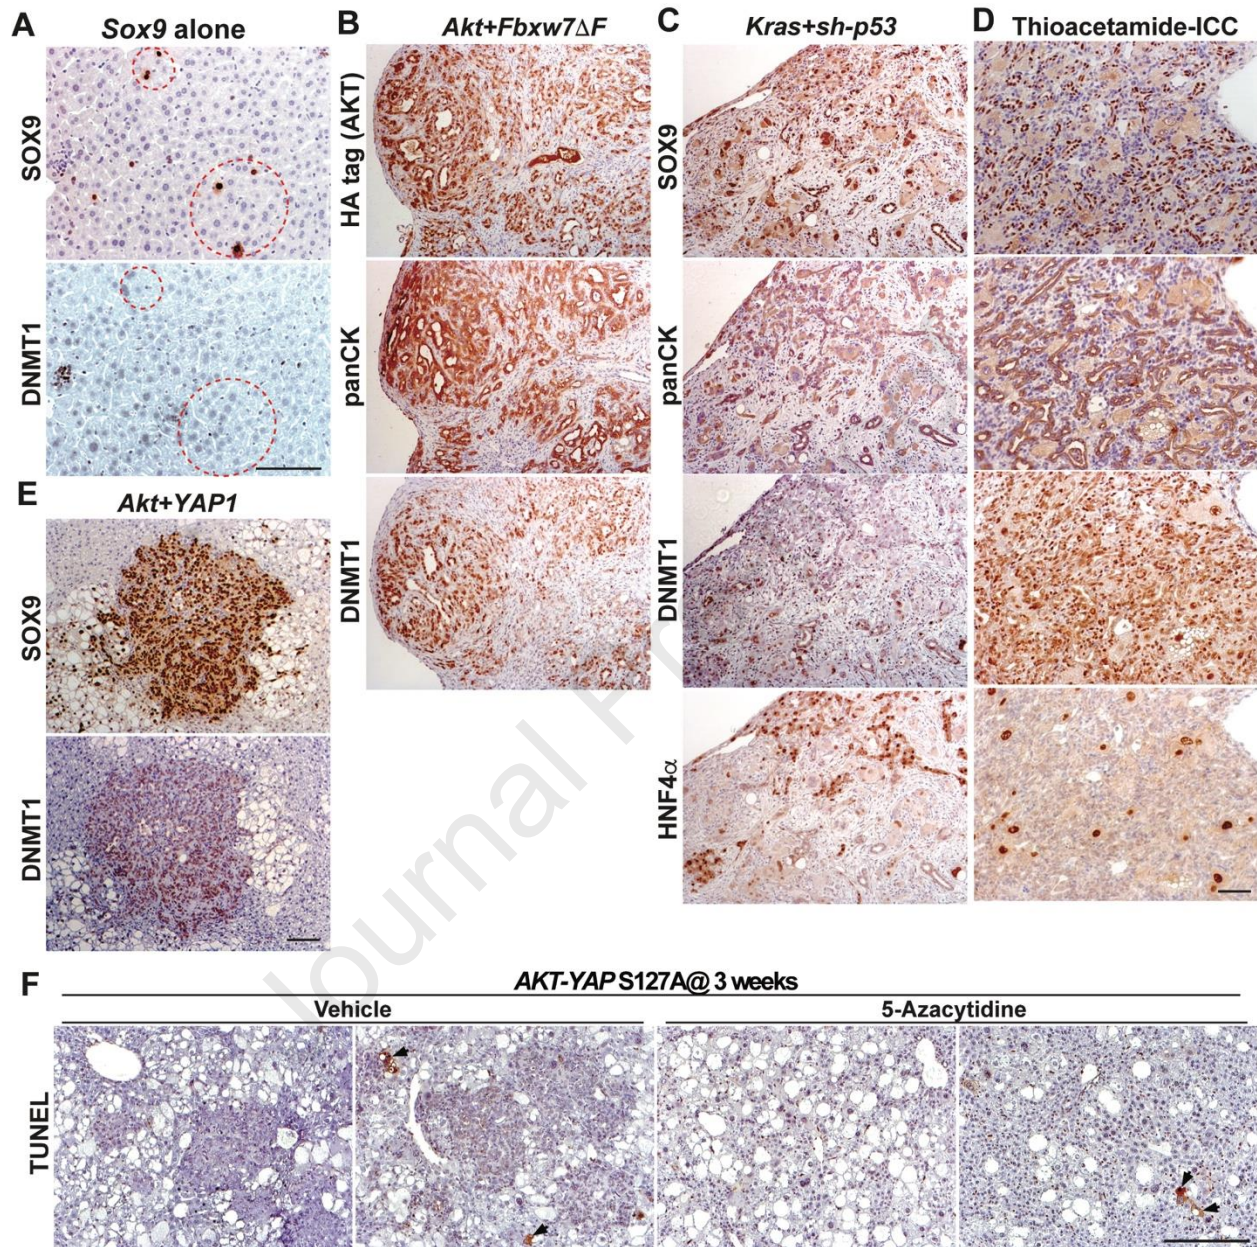

**Figure S3. DNMT1 expression in HC-derived ICC models. (A)** Representative IHC staining of Sox9 expression plasmid-injected liver 3 weeks after injection showing absence of DNMT1 expression in Sox9 singular-transduced HCs. **(B)** Representative IHC staining of liver from *Akt-Fbxw7 $\Delta$ F*-driven ICC shows strong DNMT1 expression (100x). **(C)** Representative IHC staining of liver from *KRAS-sh-p53*-driven ICC shows strong

DNMT1 expression (100x). **(D)** Representative IHC staining of liver from *Akt-YAP*-driven ICC shows strong DNMT1 expression (100x). **(E)** Representative IHC staining of liver from TAA-administered mice at 24 weeks. IHC staining indicates panCK<sup>+</sup>;SOX9<sup>+</sup>;HNF4 $\alpha$ <sup>-</sup>;DNMT1<sup>+</sup> ICC with biliary morphology. **(F)** Representative TUNEL staining of liver from vehicle or 5-azacytidine-treated mice bearing *Akt-YAP1*-liver cancer at 3 weeks post HDTV1. Arrows indicate TUNEL<sup>+</sup> cells. Scale bars:100  $\mu$ m.

Journal Pre-proof

**Figure S4**

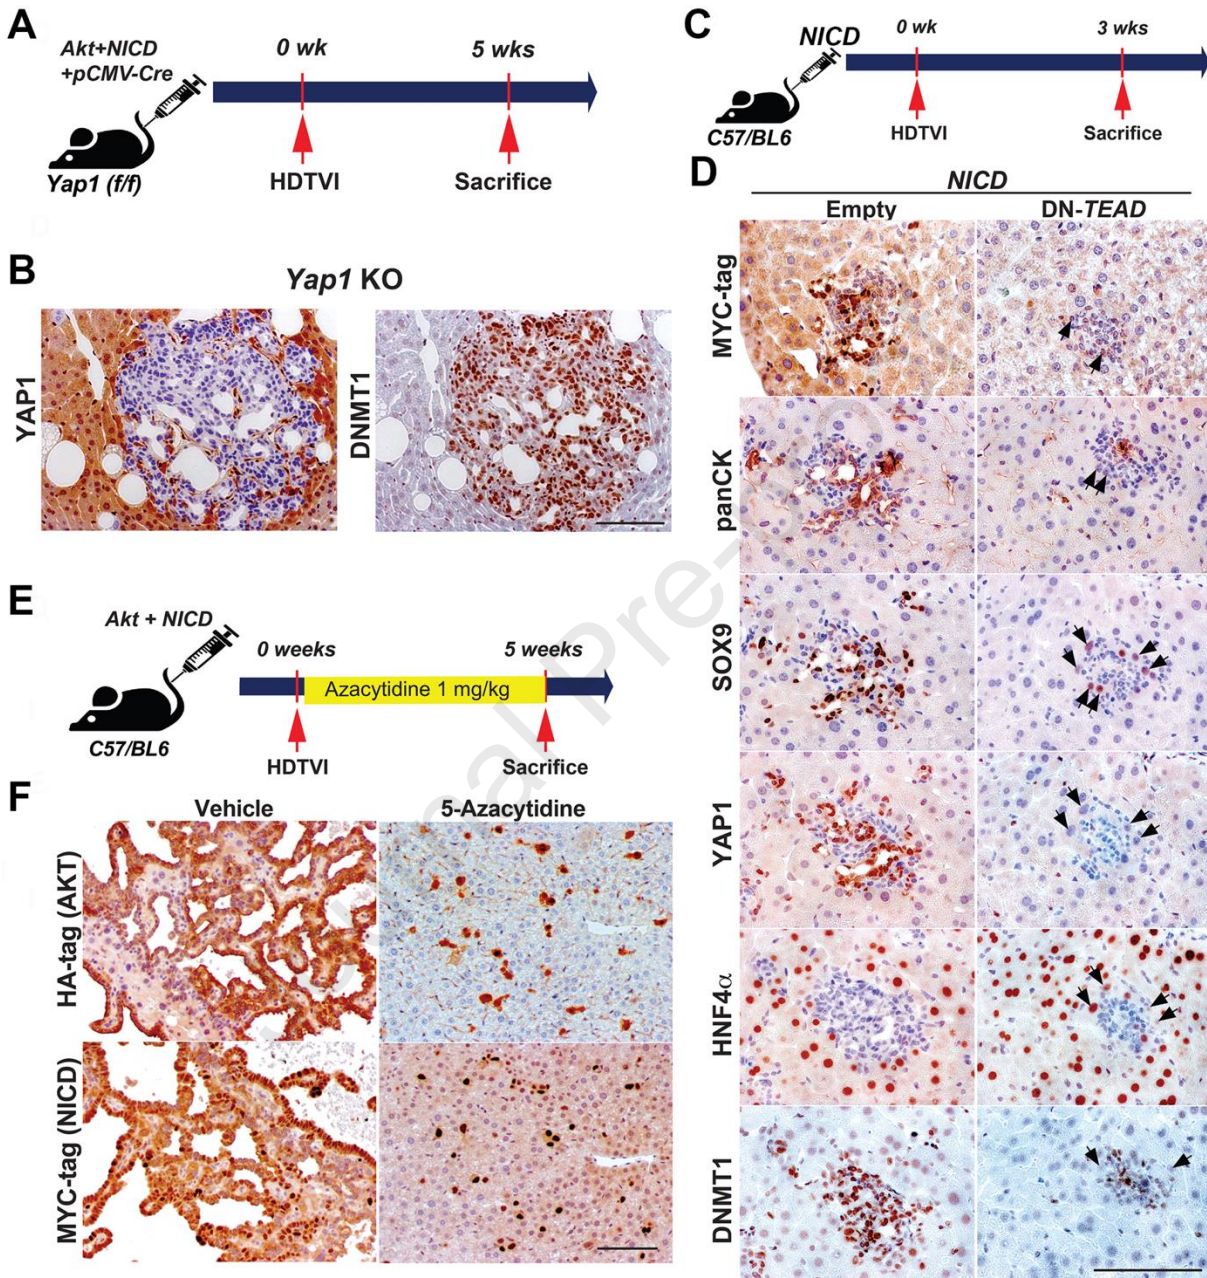

**Figure S4. DNMT1 in HC-driven ICC. (A and B)** Experimental design illustrating plasmids used for HDTV1, mice used in study and time-points analyzed. IHC staining for *Akt-NICD-Yap1* KO ICC at 5 weeks post HDTV1 showing strong DNMT1 expression. **(C)**

**and D)** Experimental design illustrating use of NICD alone or NICD + dn-TEAD plasmids for HDTV1 and time-points analyzed. Representative IHC staining of *NICD-Empty* or *NICD-DN-TEAD* injected livers showing *NICD*-transfected cells (MYC-tag<sup>+</sup>) with intact HC-to-ICC reprogramming with loss of HNF4 $\alpha$  and gain of YAP, panCK and DNMT1. *DN-TEAD* livers showing *NICD*-transfected cells with defective HC-to-BEC reprogramming with continued HNF4 $\alpha$  staining and absent of DNMT1 in YAP1<sup>-</sup> HCs (black arrows). **(D)** Experimental design illustrating 5-Azacytidine treatment, plasmid used for HDTV1, mice used in study and time-point analyzed. **(E)** Representative IHC images for HA-tag (AKT), MYC-tag (NICD), and panCK showing dramatic tumor development in *Akt-NICD* WT livers and normal histology in 5-Azacytidine-treated livers at 5 weeks post HDTV1. Scale bars:100  $\mu$ m.

Figure S5

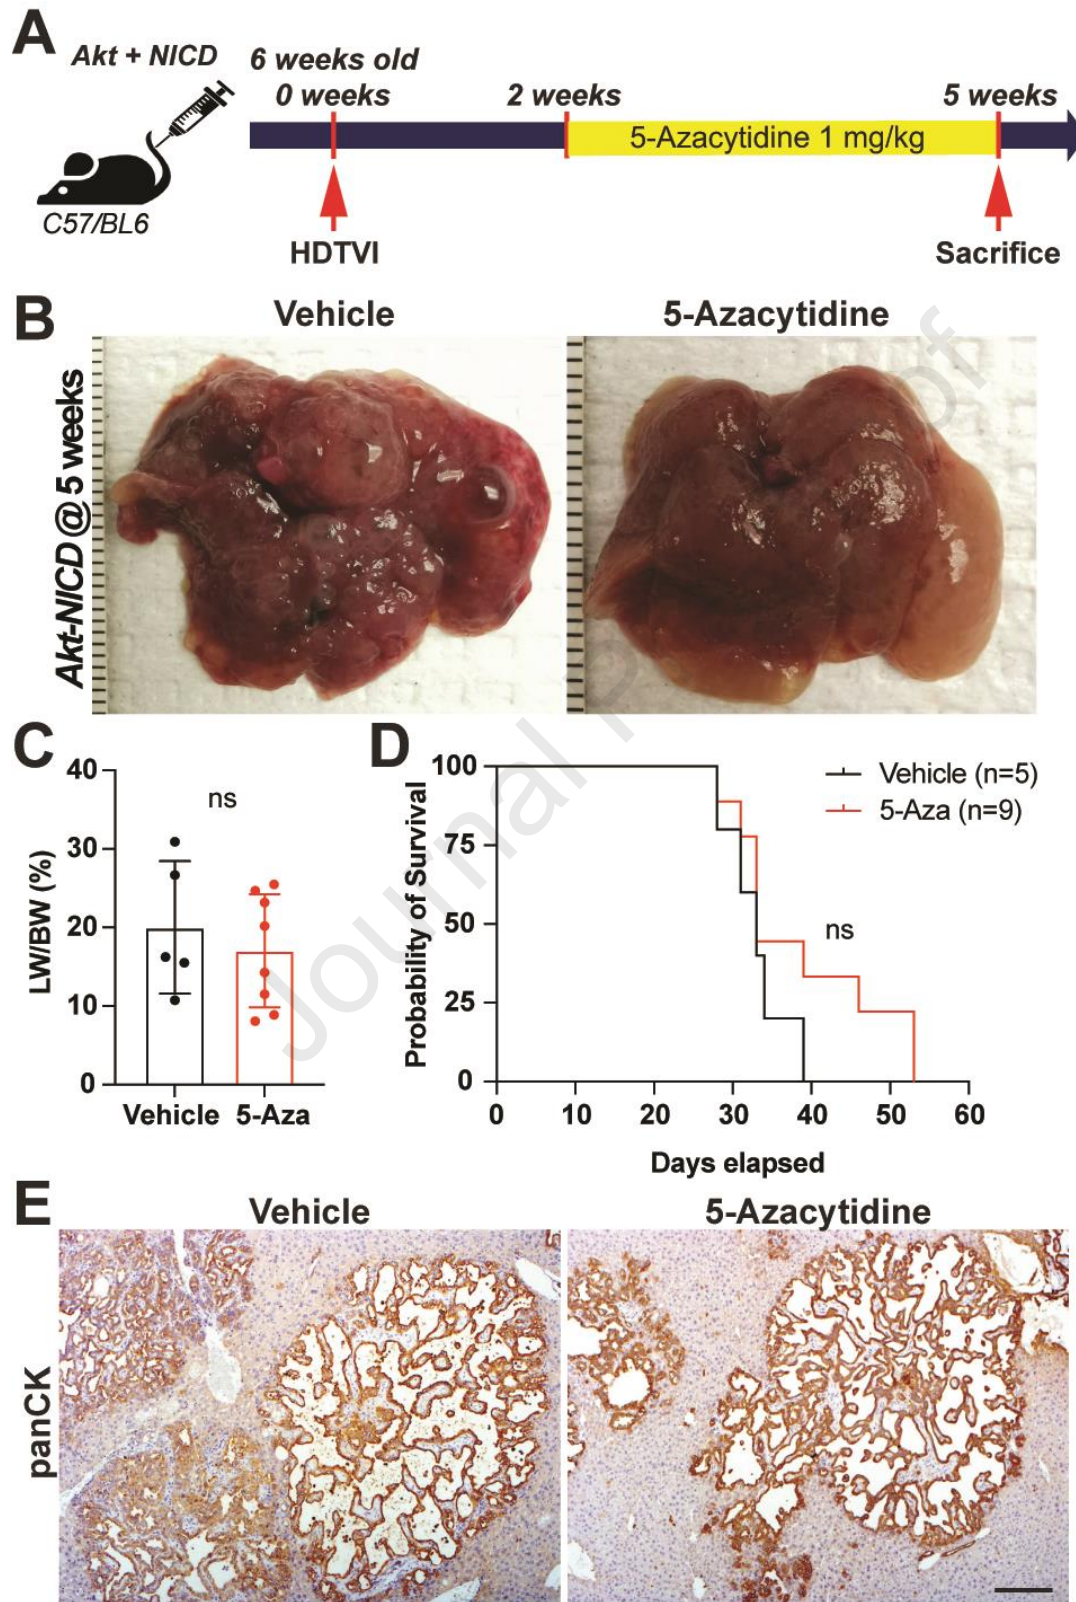

**Figure S5: Pharmacologic DNMT1 inhibition does not reduce advanced AN-ICC tumor burden. (A)** Experimental design illustrating 5-Azacytidine treatment, plasmids used for HDTV1, mice used in study and time-points analyzed. **(B)** Representative gross images show comparable *Akt-NICD* tumor development between Vehicle or 5-Azacytidine-treated livers at 5w post-injection **(C)** LW/BW ratio depicts comparable tumor burden in Vehicle or 5-Azacytidine-treated animals at 5w. **(D)** Kaplan-Meier survival curve showing comparable survival rate between Vehicle or 5-Azacytidine-treated mouse bearing AN-ICC. **(E)** Representative IHC images of 5w vehicle- or 5-Azacytidine-treated livers bearing *Akt-NICD*-driven ICC component positive for panCK. Ns, not significant; Scale bar: 100um.



**Figure S6**

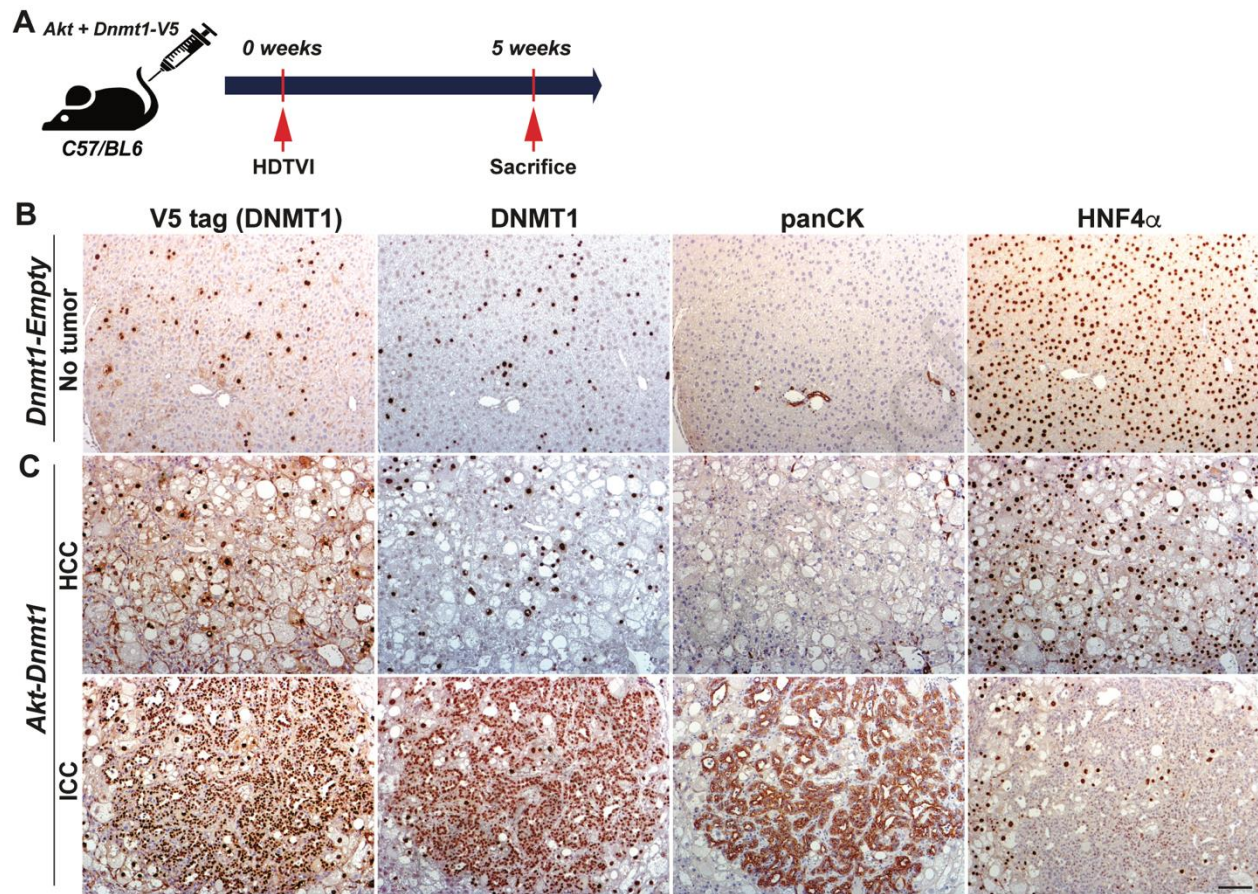

**Figure S6:** Concomitant expression of *mysAkt* and *Dnmt1* in a subset of murine HCs in vivo induces liver cancer development including ICC. **(A)** Experimental design illustrating plasmids used for HDTV1, mice used in study and time-points analyzed. **(C)** Representative IHC images of 5w *Akt-Dnmt1* show HCC and few ICC components to be positive. **(B)** In *Dnmt1-Empty* liver, no tumor was seen and all V5-tag<sup>+</sup> cells retained HC morphology without clonal expansion. Scale bars: 100 $\mu$ m.

Figure S7

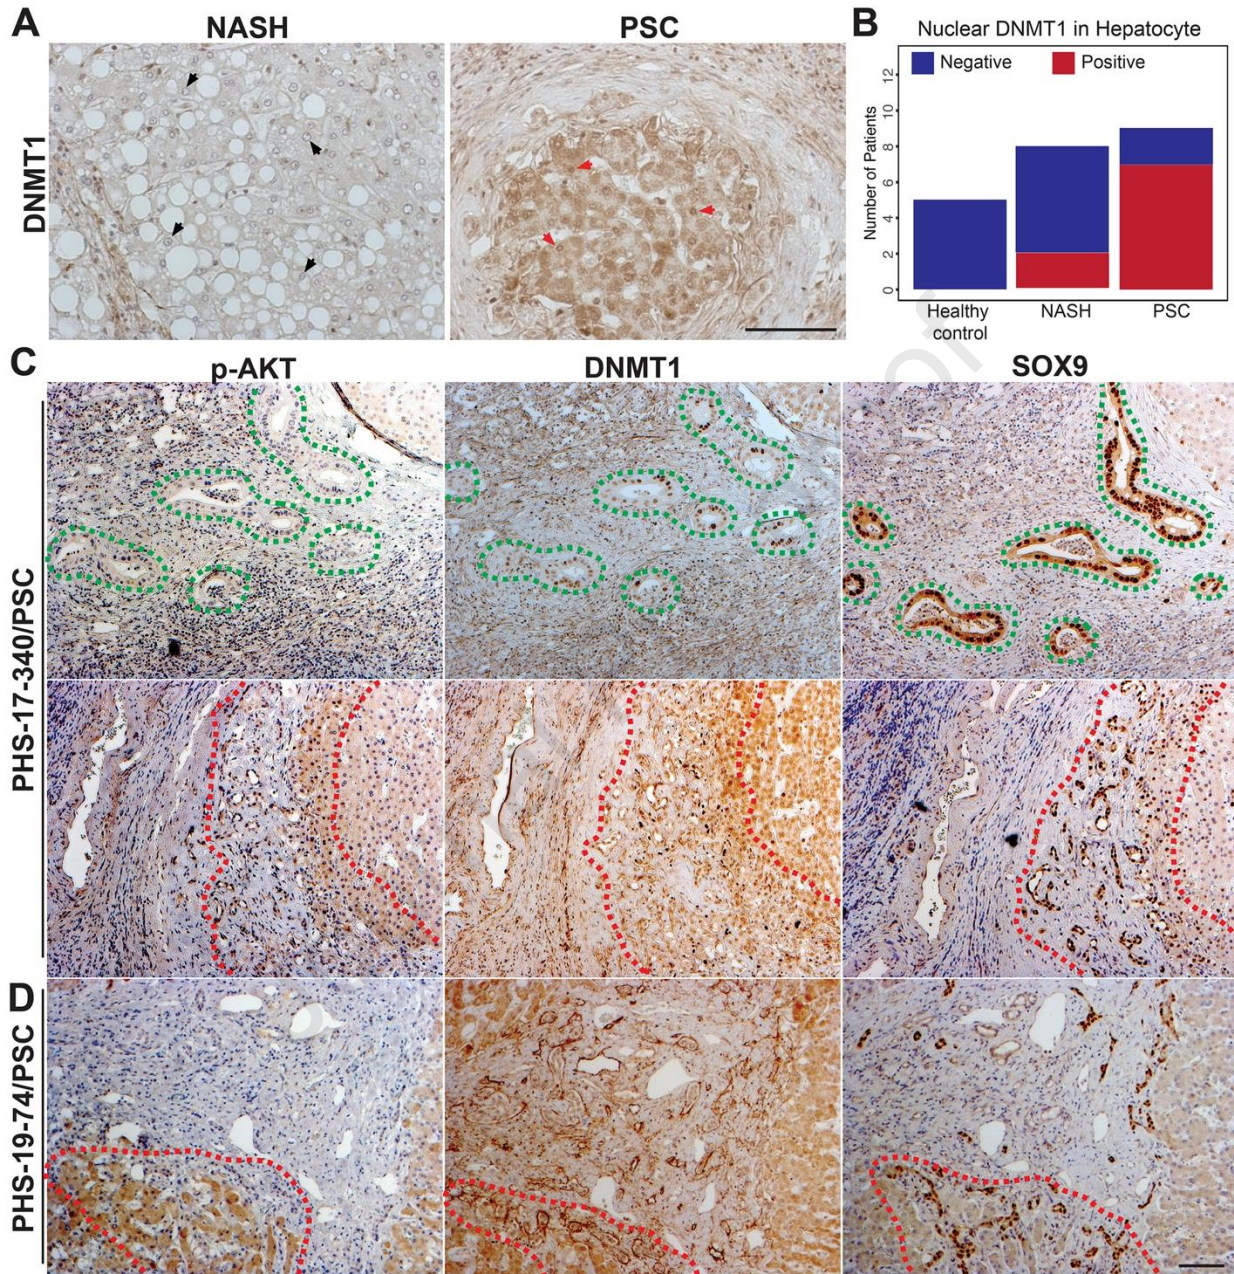

Figure S7. DNMT1 and p-AKT co-expression in PSC cases with ICC-like regions.

(A) Representative IHC images of liver section from patients with PSC showing increased nuclear DNMT1 in HCs as compared to NASH or healthy liver. Black arrows point to DNMT1<sup>-</sup> hepatocytes; red arrows to DNMT1<sup>+</sup> hepatocytes. (B) Stacked-bar graph

showing higher incidence of nuclear DNMT1 in HCs in PSC patient livers compared with NASH and healthy livers. **(C and D)** Representative IHC images showing ICC-like premalignant foci in only a subset of PSC patient livers which also showed aberrant expression of p-AKT and DNMT1 in SOX9+ cells. Green dashed lines depicts SOX9+;DNMT1+;p-AKT<sup>-</sup> cells and Red dashed lines depicts SOX9+;DNMT1+;p-AKT<sup>+</sup> cells. Scale bars:100 μm

Journal Pre-proof

## **ONLINE SUPPLEMENT**

### **Table of content:**

- 1. SUPPLEMENTARY METHODS (WITH REFERENCES)**
- 2. SUPPLEMENTARY TABLES (Table S1-S5)**
- 3. SUPPLEMENTARY FIGURES AND LEGENDS (Figure S1-S7)**

Journal Pre-proof

## 1. SUPPLEMENTARY METHODS (WITH REFERENCES)

**Animal Models of Intrahepatic Cholangiocarcinoma.** 10 µg *pT3-EF1α-myrAkt-HA*, 20 µg of *pT3-EF1α-Myc-N1ICD/pT3-EF1α-Flag-YAP1 S127A* and 60 µg mg of *pCMV-Cre* (or *pCMV-empty*), or 10 µg *pT3-EF1α-myrAkt-HA* and 20 µg of *pT3-EF1α-Sox9*, or µg mg of *pT3-EF1α-myrAkt-HA-sh-Luciferase*, 20 µg of *pT3-EF1α-Myc-N1ICD*, or 10 µg of *pT3-EF1α-myrAkt-HA-Sh-Yap1*, 20 µg of *pT3-EF1α-Myc-N1ICD*, or 10 µg of *pT3-EF1α-myrAkt-HA-Sh-Dnmt1*, 20 µg of *pT3-EF1α-Myc-N1ICD*, or 10 µg of *pT3-EF1α-myrAkt-HA*, 20 µg of *pT3-EF1α-Myc-N1ICD*, 60 µg of *pT3-EF5α-Dn-TEAD*, or 20 µg of *pT3-EF1α-Myc-N1ICD*, 60 µg of *pT3-EF5α-Dn-TEAD*, or 10 µg of *pT3-EF1α-myrAkt-HA-sh-Yap1*, 20 µg of *pT3-EF1α-Myc-N1ICD*, 10 µg and 40 µg of *pT3-EF1α-Dnmt1-V5*, or 10 µg of *pT3-EF1α-myrAkt-HA*, 20 µg of *pT3-EF1α-Myc-N1ICD*, 60 µg of *pT3-EF5α-Dn-TEAD*, 40 µg of *pT3-EF1α-Dnmt-V5*, or 10 µg of *pT3-EF1α-myrAkt-HA-sh-Luciferase*, 20 µg of *pT3-EF1α-Myc-N1ICD* and 40 µg of *pCMV-empty*, or 10 µg of *pT3-EF1α-myrAkt-HA-sh-Yap1*, 20 µg of *pT3-EF1α-Myc-N1ICD* and 40 µg of *pCMV-Cre*, or 10 µg of *pT3-EF1α-myrAkt-HA*, 20 µg of *Fbxw7ΔF*, or 10 µg of *Kras G12D*, 40 µg of *sh-p53* along with the transposase in a ratio of 25:1 were diluted in 2 ml of normal saline (0.9% NaCl), filtered through 0.22µm filter (Millipore), and hydrodynamically injected into the lateral tail vein of mice<sup>1-3</sup>. All animals were sacrificed between 2-5 weeks of plasmids injections unless otherwise indicated.

**Immunohistochemistry (IHC).** Mouse liver tissues were fixed for 48 h in 10% neutralized formalin (Fisher Chemicals), transferred into 70% ethanol and then dehydrated and

embedded in paraffin. For IHC, formalin-fixed sections were deparaffinized in graded xylene and ethanol and rinsed in PBS. For antigen retrieval, samples were microwaved for 12 min in pH 6.0 sodium citrate buffer (HA-tag, Myc-tag, panCK, SOX9) or pH 9.0 Tris-EDTA buffer (p-AKT) or DAKO (V5-tag), or were pressure cooked for 20 min in pH 9.0 Tris-EDTA buffer (YAP1 and HNF4 $\alpha$ ) or were autoclaved for 1 h in pH 9.0 Tris-EDTA buffer (DNMT1). After cooling, samples were placed in 3% H<sub>2</sub>O<sub>2</sub> (Fisher Chemicals) for 10 min to quench endogenous peroxide activity. After washing with PBS, slides were blocked with Super Block (ScyTek Laboratories) for 10 min. Sections were incubated for overnight at 4C with the primary antibodies (Supplementary Table 2. Sections were then incubated with species-specific biotinylated secondary antibodies (EMD Millipore, Supplementary Table 2) for 1 h, at room temperature. Sections were incubated with Vectastain ABC Elite kit (Vector Laboratories) and signal was detected with DAB Peroxidase Substrate Kit (Vector Laboratories) followed by quenching in distilled water for 5 min. Slides were counterstained with hematoxylin (ThermoFisher Scientific), dehydrated to xylene (Fisher Chemicals) and coverslips applied with Cytoseal XYL (ThermoFisher Scientific).

**Immunofluorescence.** Paraffin embedded liver sections (5  $\mu$ m thick) were deparaffinized using xylene (Fisher Chemicals) and rehydrated by incubating the slices in ethanol (100% and 95% v/v, each 3x5 min) and washed in PBS. Heat-induced epitope retrieval was performed for 20 min using a pressure cooker with pH 6.0 sodium citrate buffer. Sections were washed in PBS, permeabilized for 5 minutes with PBS/0.3% Triton X and blocked with PBS/0.3% Triton X/10% bovine serum albumin (BSA) for 45 minutes

at room temperature. Sections were incubated with primary antibodies in PBS/0.3% Triton X/10% BSA overnight at 4C. At the end of the incubation, sections were washed thrice and incubated with fluorochrome-conjugated secondary antibodies in PBS/0.3% Triton X/10% BSA for 1h at room temperature, then washed in PBS/0.1% Triton X 3 times. Liver sections were mounted using Prolong Gold Antifade w/DAPI (Invitrogen) and pictures were acquired using LSM700 confocal microscope and the Zen Software (Zeiss).

### **DNMT1 ChIP-seq analysis.**

Chromatin Immunoprecipitation: Frozen liver tissue was sent to Active Motif Services (Carlsbad, CA) for ChIP-Seq. Active Motif prepared chromatin, performed ChIP reactions, generated libraries, sequenced the libraries, and performed basic data analysis. In brief, tissue was submersed in PBS + 1% formaldehyde, cut into small pieces, and incubated at room temperature for 15 minutes. Fixation was stopped by the addition of 0.125 M glycine (final). The tissue pieces were then treated with a TissueTearer and finally spun down and washed 2x in PBS. Chromatin was isolated by adding lysis buffer, followed by disruption with a Dounce homogenizer. Lysates were sonicated and the DNA sheared to an average length of 300-500 bp with Active Motif's EpiShear probe sonicator (cat# 53051). Genomic DNA (Input) was prepared by treating aliquots of chromatin with RNase, proteinase K and heat for de-crosslinking, followed by SPRI beads clean up (Beckman Coulter) and quantitation by Clariostar (BMG Labtech). Extrapolation to the original chromatin volume allowed determination of the total chromatin yield. An aliquot of chromatin (40 ug) was precleared with protein A agarose beads (Invitrogen). Genomic DNA regions of interest were isolated using antibodies against DNMT1 (Cell Signaling Technology, cat#:5032). Complexes were washed, eluted from the beads with SDS

buffer, and subjected to RNase and proteinase K treatment. Crosslinks were reversed by incubation overnight at 65C, and ChIP DNA was purified by phenol-chloroform extraction and ethanol precipitation.

ChIP-Sequencing (Illumina): Illumina sequencing libraries (a custom type, using the same paired read adapter oligonucleotides described by Bentley et al., (2008))<sup>4</sup> were prepared from the ChIP and Input DNAs on an automated system (Apollo 342, Wafergen Biosystems/Takara). After a final PCR amplification step, the resulting DNA libraries were quantified and sequenced on Illumina's NextSeq 500 (75 nt reads, single end). Reads were aligned to the mouse genome (mm10) using the BWA algorithm (default settings)<sup>5</sup>. Duplicate reads were removed and only uniquely mapped reads (mapping quality  $\geq 25$ ) were used for further analysis. Alignments were extended in silico at their 3'-ends to a length of 200 bp, which is the average genomic fragment length in the size-selected library, and assigned to 32-nt bins along the genome. The resulting histograms (genomic "signal maps") were stored in bigWig files. Peak locations were determined using the MACS algorithm (v2.1.0) with a cutoff of  $p\text{-value} = 1e\text{-}7^6$ . Peaks that were on the ENCODE blacklist of known false ChIP-Seq peaks were removed. Signal maps and peak locations were used as input data to Active Motifs proprietary analysis program, which creates Excel tables containing detailed information on sample comparison, peak metrics, peak locations and gene annotations.

## REFERENCES

1. Tao J, Zhang R, Singh S, et al. Targeting beta-catenin in hepatocellular cancers induced by coexpression of mutant beta-catenin and K-Ras in mice. *Hepatology* 2017;65:1581-1599.
2. Fan B, Malato Y, Calvisi DF, et al. Cholangiocarcinomas can originate from hepatocytes in mice. *J Clin Invest* 2012;122:2911-5.



3. Wang J, Dong M, Xu Z, et al. Notch2 controls hepatocyte-derived cholangiocarcinoma formation in mice. *Oncogene* 2018;37:3229-3242.
4. Bentley DR, Balasubramanian S, Swerdlow HP, et al. Accurate whole human genome sequencing using reversible terminator chemistry. *Nature* 2008;456:53-9.
5. Li H, Durbin R. Fast and accurate short read alignment with Burrows-Wheeler transform. *Bioinformatics* 2009;25:1754-60.
6. Zhang Y, Liu T, Meyer CA, et al. Model-based analysis of ChIP-Seq (MACS). *Genome Biol* 2008;9:R137.

Journal Pre-proof

## 2. SUPPLEMENTARY TABLES

**Table S1: Summary of Patients with PSC and NASH used in the study.**

| Patient Record Number | Age | Sex | SOX9   | pAKT S473 | YAP    | Hepatocyte DNMT1 |        | Disease                                                 |
|-----------------------|-----|-----|--------|-----------|--------|------------------|--------|---------------------------------------------------------|
|                       |     |     |        |           |        | C                | N      |                                                         |
| PHR17-187             | 44  | F   | <20%   | NEG       | 20-50% | 100%             | NEG    | PSC                                                     |
| PHR17-315             | 39  | M   | NEG    | NEG       | <20%   | 100%             | NEG    | PSC                                                     |
| PHR17-318             | 32  | M   | 20-50% | NEG       | <20%   | 50%              | 20-50% | PSC                                                     |
| PHR17-340             | 47  | F   | 20-50% | <20%      | 20-50% | 100%             | 20-50% | PSC                                                     |
| PHR17-471             | 44  | F   | <20%   | <20%      | NEG    | 100%             | <20%   | PSC                                                     |
| PHS18-35              | 35  | M   | <20%   | <20%      | NEG    | 0%               | NEG    | PSC                                                     |
| PHR19-64              | 24  | M   | <20%   | 20-50%    | 20-50% | 100%             | <20%   | PSC                                                     |
| PHR19-67              | 32  | F   | NEG    | NEG       | <20%   |                  |        | PSC                                                     |
| PHR19-74              | 50  | M   | <20%   | 20-50%    | <20%   | 100%             | <20%   | PSC                                                     |
| PHR19-80              | 61  | F   | NEG    | 20-50%    | <20%   | 100%             | NEG    | PSC                                                     |
| PHR16-107             | 67  | M   | <20%   | <20%      | <20%   | 0%               | 0      | NASH                                                    |
| PHR17-50              | 73  | F   | <20%   | NEG       | <20%   | 0%               | NEG    | NASH                                                    |
| PHR17-114             | 53  | F   | 20-50% | 20-50%    | NEG    |                  |        | NASH                                                    |
| PHR17-235             | 63  | M   | 20-50% | 20-50%    | NEG    | 0%               | NEG    | NASH                                                    |
| PHR17-238             | 65  | M   | <20%   | 20-50%    | NEG    | 50%              | NEG    | NASH                                                    |
| PHR17-247             | 61  | M   | <20%   | NEG       | <20%   |                  |        | NASH                                                    |
| PHR17-299             | 56  | F   | <20%   | <20%      | <20%   | <20%             | 0      | NASH                                                    |
| PHR18-25              | 68  | F   | 20-50% | 20-50%    | <20%   | 50%              | <20%   | NASH                                                    |
| PHR18-219             | 62  | F   | <20%   | NEG       | <20%   | <20%             | <20%   | NASH                                                    |
| PHR19-107             | 78  | F   | <20%   | <20%      | <20%   | 100%             | NEG    | NASH                                                    |
| NHL1029               |     |     | NEG    | NA        | NEG    |                  |        | Healthy control liver                                   |
| 16-5566               | 54  | F   | NEG    | NEG       | NEG    |                  |        | Healthy control liver (underlying colon adenocarcinoma) |
| 12-9718               | 60  | M   | NEG    | NEG       | NEG    |                  |        | Healthy control liver (underlying colon adenocarcinoma) |

|             |    |   |     |     |        |   |     |                                                         |
|-------------|----|---|-----|-----|--------|---|-----|---------------------------------------------------------|
| 17-9693     | 49 | F | NEG | NEG | NEG    |   |     | Healthy control liver (underlying colon adenocarcinoma) |
| 13-15397    | 54 | F | NEG | NEG | 20-50% |   |     | Healthy control liver (underlying colon adenocarcinoma) |
| 14-2191     | 36 | M | NEG | NEG | NEG    |   |     | Healthy control liver (underlying colon adenocarcinoma) |
| PHS18-34295 |    |   |     |     |        | 0 | NEG | Healthy control liver                                   |
| PHS18-11592 |    |   |     |     |        | 0 | NEG | Healthy control liver                                   |
| PHS18-5904  |    |   |     |     |        | 0 | NEG | Healthy control liver                                   |
| PHS16-40535 |    |   |     |     |        | 0 | NEG | Healthy control liver                                   |
| PHS16-32066 |    |   |     |     |        | 0 | NEG | Healthy control liver                                   |

**Abbreviations:** C-cytoplasmic; N- nuclear; PSC- Primary sclerosing cholangitis; NASH- Non alcoholic steatohepatitis

Journal Pre-proof

**Table S2: Antibody List used in the study****Primary Antibodies:**

| Target                  | Species | Dilution                   | Source                                          | Catalog Number |
|-------------------------|---------|----------------------------|-------------------------------------------------|----------------|
| HA-tag                  | Mouse   | 1:50 (IHC)                 | Cell Signaling                                  | CS2367         |
| MYC-tag                 | Rabbit  | 1:100 (IHC)                | Maine Medical Center Research Institute (mmcri) | Vli01          |
| Pan-CYTOKERATIN (panCK) | Rabbit  | 1:200 (IHC)                | Dako                                            | Z0622          |
| p-AKT                   | Rabbit  | 1:100 (IHC)                | Cell Signaling                                  | CS4060         |
| SOX9                    | Rabbit  | 1:200 (IF)<br>1:2000 (IHC) | EMD Millipore                                   | Ab5535         |
| YAP1                    | Rabbit  | 1:100 (IF and IHC)         | Cell Signaling                                  | CS14074        |
| HNF4 $\alpha$           | Rabbit  | 1:100 (IHC)                | Cell Signaling                                  | CS3113         |
| PCNA                    | Mouse   | 1:200 (IF)                 | Santa Cruz                                      | sc-56          |
| CK19                    | Rat     | 1:10 (IF)                  | DSHB                                            | TROMA III      |
| DNMT1                   | Rabbit  | 1:100 (IHC)                | Abcam                                           | ab188453       |

**Secondary Antibodies:**

| Secondary Antibody                           | Species | Source        | Catalog Number |
|----------------------------------------------|---------|---------------|----------------|
| Donkey anti-Rabbit IgG Biotin                | Donkey  | EMD Millipore | AP182B         |
| Goat anti-Mouse IgG (H+L) Biotin             | Goat    | EMD Millipore | AP181B         |
| Alexa-Fluor 555 Donkey anti-Rabbit IgG (H+L) | Donkey  | Invitrogen    | A31572         |
| Alexa-Fluor 488 Donkey anti-Rat IgG (H+L)    | Donkey  | Invitrogen    | A21208         |
| Alexa-Fluor 647 Goat anti-Mouse IgG (H+L)    | Goat    | Invitrogen    | A21236         |

**Table S3: List of 200 genes used to estimate the genetic identity of *Akt-NICD-ICC* transcriptome with large clinical ICC cohort by Nearest Template Prediction assay**

| Number | Gene    |
|--------|---------|
| 1      | TAGLN2  |
| 2      | COL4A1  |
| 3      | SPP1    |
| 4      | CCND1   |
| 5      | COL4A2  |
| 6      | NRARP   |
| 7      | ENC1    |
| 8      | OSMR    |
| 9      | KRT8    |
| 10     | MKI67   |
| 11     | ANXA2   |
| 12     | ADCY5   |
| 13     | PXDN    |
| 14     | PODXL   |
| 15     | TRIM47  |
| 16     | DDR1    |
| 17     | SOX9    |
| 18     | SPON1   |
| 19     | LBH     |
| 20     | FSTL1   |
| 21     | ANXA5   |
| 22     | TPM4    |
| 23     | SOX4    |
| 24     | FLNA    |
| 25     | B4GALT6 |
| 26     | ELN     |
| 27     | S100A11 |
| 28     | ARL4C   |
| 29     | CELSR2  |
| 30     | KRT18   |
| 31     | CD9     |

|    |          |
|----|----------|
| 32 | VCAM1    |
| 33 | SLCO3A1  |
| 34 | ADAMTS1  |
| 35 | LAMA5    |
| 36 | TUBA1A   |
| 37 | CSRP1    |
| 38 | TOP2A    |
| 39 | FAR1     |
| 40 | FADS3    |
| 41 | EIF2AK3  |
| 42 | TRIB2    |
| 43 | SYNPO    |
| 44 | DCDC2    |
| 45 | TTYH1    |
| 46 | CD63     |
| 47 | DKK3     |
| 48 | FAM118A  |
| 49 | SH3PXD2B |
| 50 | JAG1     |
| 51 | CLASP1   |
| 52 | PTPN13   |
| 53 | VIM      |
| 54 | TGM2     |
| 55 | EHF      |
| 56 | PTK7     |
| 57 | SCARA3   |
| 58 | BCAM     |
| 59 | BICC1    |
| 60 | CKB      |
| 61 | LMNA     |
| 62 | PRC1     |
| 63 | MARCKS   |
| 64 | MCAM     |
| 65 | BMP6     |
| 66 | ENAH     |
| 67 | STMN1    |
| 68 | PFKFB4   |
| 69 | RHBDF1   |
| 70 | MAP1B    |

|     |          |
|-----|----------|
| 71  | ADGRG1   |
| 72  | SRC      |
| 73  | MAP2     |
| 74  | ANLN     |
| 75  | VILL     |
| 76  | HEYL     |
| 77  | WLS      |
| 78  | SMTNL2   |
| 79  | GAS6     |
| 80  | ELF3     |
| 81  | ACTN1    |
| 82  | PHLDA3   |
| 83  | CENPF    |
| 84  | PPP1R9B  |
| 85  | MGAT5    |
| 86  | GPC6     |
| 87  | SERPINB6 |
| 88  | ARHGEF10 |
| 89  | VSIG10   |
| 90  | COL1A1   |
| 91  | GLS      |
| 92  | ZNF703   |
| 93  | AGPAT1   |
| 94  | RACGAP1  |
| 95  | CDKN1A   |
| 96  | CDH15    |
| 97  | SCD      |
| 98  | LIG1     |
| 99  | LTBP1    |
| 100 | INHBB    |
| 101 | CELA1    |
| 102 | CYP4F12  |
| 103 | FAM210A  |
| 104 | CYP2D6   |
| 105 | CDC14B   |
| 106 | GNA12    |
| 107 | RNF103   |
| 108 | FECH     |
| 109 | SUCNR1   |

|     |            |
|-----|------------|
| 110 | AK3        |
| 111 | IPMK       |
| 112 | SULT1B1    |
| 113 | PDK2       |
| 114 | RETSAT     |
| 115 | FBXO8      |
| 116 | STAT5B     |
| 117 | CAT        |
| 118 | ERBB3      |
| 119 | SLC25A42   |
| 120 | SFXN5      |
| 121 | PGM2       |
| 122 | C16orf70   |
| 123 | MN1        |
| 124 | TYMP       |
| 125 | GNS        |
| 126 | CHUK       |
| 127 | DHRS3      |
| 128 | CMBL       |
| 129 | TSC1       |
| 130 | SELENBP1   |
| 131 | RNF152     |
| 132 | MOCS1      |
| 133 | ABCD3      |
| 134 | NFIX       |
| 135 | SLC2A2     |
| 136 | NDST1      |
| 137 | RMND5A     |
| 138 | CHPT1      |
| 139 | FOXN3      |
| 140 | ETFDH      |
| 141 | HLF        |
| 142 | GGACT      |
| 143 | DYRK2      |
| 144 | AL049629.2 |
| 145 | ABCG8      |
| 146 | IDH3B      |
| 147 | HSD17B11   |
| 148 | PXMP4      |



|     |          |
|-----|----------|
| 149 | AGTR1    |
| 150 | HSD11B1  |
| 151 | INSIG2   |
| 152 | KHNYN    |
| 153 | ZCCHC24  |
| 154 | CA1      |
| 155 | PNPLA8   |
| 156 | SNX29    |
| 157 | CYB5R3   |
| 158 | ALDH5A1  |
| 159 | SDR42E1  |
| 160 | NQO2     |
| 161 | ACBD5    |
| 162 | KHK      |
| 163 | OPA1     |
| 164 | DONSON   |
| 165 | NAA60    |
| 166 | TSPAN12  |
| 167 | NPC1     |
| 168 | FTCD     |
| 169 | SEPHS2   |
| 170 | UQCRB    |
| 171 | ZFAND6   |
| 172 | SCAP     |
| 173 | PTTG1IP  |
| 174 | MCC      |
| 175 | PCTP     |
| 176 | CYP4F8   |
| 177 | RUFY3    |
| 178 | ECM1     |
| 179 | PRKD3    |
| 180 | PPARGC1B |
| 181 | SASH1    |
| 182 | DENND4A  |
| 183 | FAM13A   |
| 184 | HMGCS2   |
| 185 | HYKK     |
| 186 | SDHC     |
| 187 | CA14     |

|     |         |
|-----|---------|
| 188 | ACOT12  |
| 189 | RILP    |
| 190 | UGT1A1  |
| 191 | CLDN1   |
| 192 | NR1H4   |
| 193 | ISOC1   |
| 194 | NDUFA10 |
| 195 | ACSL1   |
| 196 | PAQR7   |
| 197 | RNF125  |
| 198 | PBLD    |
| 199 | SLC6A9  |
| 200 | MLXIPL  |

Journal Pre-proof

**Table S4: List of 169 overlapped genes by integration of DNMT1 ChIP-seq and down-regulated in transcriptome profile**

| Number | Gene    |
|--------|---------|
| 1      | GM4980  |
| 2      | DENND4A |
| 3      | ACAD11  |
| 4      | INCA1   |
| 5      | ARRDC3  |
| 6      | PTTG1IP |
| 7      | SMIM13  |
| 8      | ACO1    |
| 9      | AK2     |
| 10     | APBA2   |
| 11     | ATP5A1  |
| 12     | ZFP36L1 |
| 13     | C2      |
| 14     | CHUK    |
| 15     | PLK3    |
| 16     | COX5A   |
| 17     | CREM    |
| 18     | CYP26A1 |
| 19     | DCT     |
| 20     | DYRK1B  |
| 21     | EFNA3   |
| 22     | EVI5    |
| 23     | F8      |
| 24     | FTL1    |
| 25     | GAS1    |
| 26     | GATA4   |
| 27     | GCGR    |
| 28     | GCH1    |
| 29     | GOT2    |
| 30     | AES     |
| 31     | H2-KE6  |
| 32     | FOXQ1   |
| 33     | HHEX    |
| 34     | HLX     |

|    |               |
|----|---------------|
| 35 | IGFBP4        |
| 36 | INSR          |
| 37 | IRS1          |
| 38 | MAFB          |
| 39 | LHX2          |
| 40 | ELOVL6        |
| 41 | SLC8B1        |
| 42 | AMACR         |
| 43 | CRELD1        |
| 44 | NPAS2         |
| 45 | NPC1          |
| 46 | NUMB          |
| 47 | P2RY2         |
| 48 | PDE9A         |
| 49 | PITX3         |
| 50 | RORA          |
| 51 | SEMA6C        |
| 52 | SOD1          |
| 53 | CAMKK2        |
| 54 | SLC25A38      |
| 55 | SNED1         |
| 56 | SDC4          |
| 57 | SPRN          |
| 58 | SH3BGRL2      |
| 59 | ALDH4A1       |
| 60 | SLC6A6        |
| 61 | CECR5         |
| 62 | TCP11L2       |
| 63 | UGP2          |
| 64 | GLTPD2        |
| 65 | L2HGDH        |
| 66 | VWA8          |
| 67 | DLGAP1        |
| 68 | LIMS2         |
| 69 | ZADH2         |
| 70 | ATRNL1        |
| 71 | RNF103        |
| 72 | C130074G19RIK |
| 73 | ZFP36         |

|     |           |
|-----|-----------|
| 74  | SLC25A25  |
| 75  | PDK1      |
| 76  | NUDT6     |
| 77  | CREBL2    |
| 78  | TUFM      |
| 79  | ZBTB44    |
| 80  | SH3BP5    |
| 81  | GABBR2    |
| 82  | GPRIN3    |
| 83  | BAHCC1    |
| 84  | GPHN      |
| 85  | GPR157    |
| 86  | BC024139  |
| 87  | SLC25A10  |
| 88  | MRPL39    |
| 89  | ABCA8B    |
| 90  | ABCC6     |
| 91  | MARVELD1  |
| 92  | ULK2      |
| 93  | VPS13C    |
| 94  | SLC35E2   |
| 95  | DENND5B   |
| 96  | ATP11C    |
| 97  | MIA3      |
| 98  | NR1D2     |
| 99  | TLCD2     |
| 100 | RBM33     |
| 101 | DRC1      |
| 102 | PDP2      |
| 103 | CREG1     |
| 104 | MN1       |
| 105 | SHF       |
| 106 | LRP3      |
| 107 | SLC25A13  |
| 108 | TNK2      |
| 109 | ACAA2     |
| 110 | GNPNAT1   |
| 111 | EPB4.1L4B |
| 112 | ABCB10    |

|     |               |
|-----|---------------|
| 113 | NGLY1         |
| 114 | GM6484        |
| 115 | TSC1          |
| 116 | ASB2          |
| 117 | EEFSEC        |
| 118 | ABHD6         |
| 119 | 1110001J03RIK |
| 120 | AAED1         |
| 121 | NDUFB9        |
| 122 | PYURF         |
| 123 | FIGNL2        |
| 124 | HINT3         |
| 125 | ACADSB        |
| 126 | LONP2         |
| 127 | PXDC1         |
| 128 | NDUFA6        |
| 129 | PNPLA8        |
| 130 | MMD           |
| 131 | EEPD1         |
| 132 | RNF125        |
| 133 | DGAT2         |
| 134 | ATG101        |
| 135 | GCSH          |
| 136 | 0610030E20RIK |
| 137 | PCYT2         |
| 138 | ELOVL5        |
| 139 | DDAH1         |
| 140 | HIST1H4H      |
| 141 | CHN2          |
| 142 | MPC2          |
| 143 | MIPEP         |
| 144 | CABYR         |
| 145 | ARHGAP42      |
| 146 | AMDHD1        |
| 147 | PITPNC1       |
| 148 | OSGIN1        |
| 149 | LRPPRC        |
| 150 | MBLAC2        |
| 151 | PMPCB         |

|     |               |
|-----|---------------|
| 152 | SLC25A16      |
| 153 | RHOX13        |
| 154 | NMNAT3        |
| 155 | GBE1          |
| 156 | TBC1D30       |
| 157 | TBC1D30       |
| 158 | ARL5A         |
| 159 | 1700001C19RIK |
| 160 | FGGY          |
| 161 | KLHL24        |
| 162 | DOCK8         |
| 163 | GRHPR         |
| 164 | MND1          |
| 165 | OCEL1         |
| 166 | 9430038I01RIK |
| 167 | CML2          |
| 168 | PHLPP1        |
| 169 | RDH10         |

Journal Pre-proof

**Table S5: 320 upstream regulators for identified 169 overlapped genes (Table S4)  
predicted by IPA-URA tool**

| Upstream Regulator           | Molecule Type                   | p-value of overlap |
|------------------------------|---------------------------------|--------------------|
| methylprednisolone           | chemical drug                   | 4.36E-07           |
| INSR                         | kinase                          | 7.17E-06           |
| moxonidine                   | chemical drug                   | 1.07E-04           |
| CPT1B                        | enzyme                          | 1.15E-04           |
| mono-(2-ethylhexyl)phthalate | chemical toxicant               | 1.37E-04           |
| D-glucose                    | chemical - endogenous mammalian | 1.98E-04           |
| IGF2BP2                      | translation regulator           | 2.75E-04           |
| ANGPTL7                      | other                           | 2.75E-04           |
| methotrexate                 | chemical drug                   | 3.22E-04           |
| peoniflorin                  | chemical drug                   | 3.27E-04           |
| APP                          | other                           | 3.71E-04           |
| TP53                         | transcription regulator         | 4.07E-04           |
| SMYD1                        | transcription regulator         | 4.71E-04           |
| tert-butyl-hydroquinone      | chemical reagent                | 4.91E-04           |
| LONP1                        | peptidase                       | 5.15E-04           |
| PTPN1                        | phosphatase                     | 5.43E-04           |
| isobutylmethylxanthine       | chemical toxicant               | 7.65E-04           |
| NKX2-2-AS1                   | other                           | 8.09E-04           |
| USP28                        | peptidase                       | 9.51E-04           |
| LDHB                         | enzyme                          | 9.51E-04           |
| ABCB7                        | transporter                     | 9.51E-04           |
| INS                          | other                           | 9.93E-04           |
| metribolone                  | chemical reagent                | 1.03E-03           |
| IGF2                         | growth factor                   | 1.12E-03           |
| CEBPA                        | transcription regulator         | 1.19E-03           |
| DIO3                         | enzyme                          | 1.23E-03           |
| Ck2                          | complex                         | 1.62E-03           |
| IGF2R                        | transmembrane receptor          | 2.01E-03           |
| CLOCK                        | transcription regulator         | 2.06E-03           |



|                                              |                                 |          |
|----------------------------------------------|---------------------------------|----------|
| GRB10                                        | other                           | 2.45E-03 |
| sphingomyelin                                | chemical - endogenous mammalian | 2.45E-03 |
| GCG                                          | other                           | 2.53E-03 |
| PNPLA2                                       | enzyme                          | 2.64E-03 |
| beraprost                                    | chemical drug                   | 2.92E-03 |
| NFU1                                         | other                           | 2.95E-03 |
| NUPR1                                        | transcription regulator         | 2.98E-03 |
| WNT3A                                        | cytokine                        | 3.00E-03 |
| UQCC3                                        | other                           | 3.12E-03 |
| GNAQ                                         | enzyme                          | 3.51E-03 |
| beta-carotene                                | chemical - endogenous mammalian | 3.59E-03 |
| streptozocin                                 | chemical drug                   | 3.78E-03 |
| elaidic acid                                 | chemical - endogenous mammalian | 3.81E-03 |
| pirinixic acid                               | chemical toxicant               | 3.96E-03 |
| Cd2+                                         | chemical toxicant               | 3.99E-03 |
| DSCAM                                        | other                           | 4.11E-03 |
| FFAR4                                        | G-protein coupled receptor      | 4.59E-03 |
| CG                                           | complex                         | 5.37E-03 |
| topiramate                                   | chemical drug                   | 5.69E-03 |
| PRKAG3                                       | kinase                          | 5.70E-03 |
| miR-124-3p (and other miRNAs w/seed AAGGCAC) | mature microRNA                 | 5.84E-03 |
| TO-901317                                    | chemical reagent                | 6.20E-03 |
| leukotriene D4                               | chemical - endogenous mammalian | 6.31E-03 |
| HNF1A                                        | transcription regulator         | 6.46E-03 |
| raloxifene                                   | chemical drug                   | 6.60E-03 |
| IGFBP2                                       | other                           | 6.64E-03 |
| rosiglitazone                                | chemical drug                   | 6.80E-03 |
| RDH5                                         | enzyme                          | 6.83E-03 |
| KLHL13                                       | other                           | 6.83E-03 |
| KLHL9                                        | other                           | 6.83E-03 |
| Gm13570/Gm4984                               | other                           | 6.83E-03 |
| JAKMIP1                                      | other                           | 6.83E-03 |

|                                                    |                                     |          |
|----------------------------------------------------|-------------------------------------|----------|
| PISD                                               | enzyme                              | 6.83E-03 |
| GRB14                                              | other                               | 6.83E-03 |
| SNX5                                               | transporter                         | 6.83E-03 |
| M6PR                                               | transporter                         | 6.83E-03 |
| FAM13A                                             | other                               | 6.83E-03 |
| diacetylbis(4-methylthiosemicarbazonato)copper(II) | chemical reagent                    | 6.83E-03 |
| MID-1                                              | chemical reagent                    | 6.83E-03 |
| myrcene                                            | chemical - endogenous non-mammalian | 6.83E-03 |
| cineole                                            | chemical drug                       | 6.83E-03 |
| FOXA2                                              | transcription regulator             | 6.83E-03 |
| dexamethasone                                      | chemical drug                       | 6.93E-03 |
| ZC3H12A                                            | enzyme                              | 7.09E-03 |
| LEP                                                | growth factor                       | 7.33E-03 |
| PHLPP1                                             | enzyme                              | 7.34E-03 |
| DBP                                                | transcription regulator             | 7.34E-03 |
| GSK3A                                              | kinase                              | 7.34E-03 |
| PRKCG                                              | kinase                              | 7.67E-03 |
| RPA1                                               | other                               | 8.12E-03 |
| POR                                                | enzyme                              | 8.14E-03 |
| GnRH analog                                        | biologic drug                       | 8.17E-03 |
| Esrra                                              | transcription regulator             | 8.28E-03 |
| HOXA9                                              | transcription regulator             | 8.33E-03 |
| IGF1                                               | growth factor                       | 8.48E-03 |
| MAP4K4                                             | kinase                              | 8.78E-03 |
| MECP2                                              | transcription regulator             | 9.29E-03 |
| PLN                                                | transporter                         | 9.59E-03 |
| TRIM2                                              | enzyme                              | 9.78E-03 |
| fenofibrate                                        | chemical drug                       | 1.04E-02 |
| sirolimus                                          | chemical drug                       | 1.06E-02 |
| TSPYL5                                             | other                               | 1.07E-02 |
| MGP                                                | other                               | 1.07E-02 |
| SULT1E1                                            | enzyme                              | 1.07E-02 |
| diallyl trisulfide                                 | chemical - endogenous non-mammalian | 1.07E-02 |

|                        |                                   |          |
|------------------------|-----------------------------------|----------|
| BACH1                  | transcription regulator           | 1.09E-02 |
| IL4                    | cytokine                          | 1.09E-02 |
| cyclic AMP             | chemical - endogenous mammalian   | 1.09E-02 |
| tributyltin            | chemical reagent                  | 1.13E-02 |
| TINCR                  | other                             | 1.16E-02 |
| Z-LLL-CHO              | chemical - protease inhibitor     | 1.18E-02 |
| ESR2                   | ligand-dependent nuclear receptor | 1.20E-02 |
| mir-133                | microRNA                          | 1.22E-02 |
| HNF4A                  | transcription regulator           | 1.24E-02 |
| CD3                    | complex                           | 1.25E-02 |
| COMMD1                 | transporter                       | 1.25E-02 |
| IRS1                   | enzyme                            | 1.29E-02 |
| GNA14                  | enzyme                            | 1.32E-02 |
| CD 437                 | chemical drug                     | 1.34E-02 |
| ACLY                   | enzyme                            | 1.35E-02 |
| SRD5A1                 | enzyme                            | 1.35E-02 |
| SD 0006                | chemical reagent                  | 1.36E-02 |
| LINC00667              | other                             | 1.36E-02 |
| STARD4                 | transporter                       | 1.36E-02 |
| SOCS7                  | other                             | 1.36E-02 |
| USP46                  | peptidase                         | 1.36E-02 |
| PTPase                 | group                             | 1.36E-02 |
| TCDD-AHR               | complex                           | 1.36E-02 |
| FBXW8                  | enzyme                            | 1.36E-02 |
| beta-apo-14'-carotenal | chemical - endogenous mammalian   | 1.36E-02 |
| NKIRAS1                | enzyme                            | 1.36E-02 |
| ME1                    | enzyme                            | 1.36E-02 |
| GABRG2                 | ion channel                       | 1.36E-02 |
| DNAJB1                 | transcription regulator           | 1.36E-02 |
| bavachalcone           | chemical reagent                  | 1.36E-02 |
| primaquine             | chemical drug                     | 1.36E-02 |
| milrinone              | chemical drug                     | 1.36E-02 |
| talarozole             | chemical drug                     | 1.36E-02 |

|                                             |                                     |          |
|---------------------------------------------|-------------------------------------|----------|
| glipizide                                   | chemical drug                       | 1.36E-02 |
| apo-13-lycopenone                           | chemical reagent                    | 1.36E-02 |
| apo-15-lycopenal                            | chemical reagent                    | 1.36E-02 |
| ZBTB7B                                      | transcription regulator             | 1.37E-02 |
| CD300LF                                     | other                               | 1.45E-02 |
| NR4A1                                       | ligand-dependent nuclear receptor   | 1.57E-02 |
| miR-223-3p (miRNAs w/seed GUCAGUU)          | mature microRNA                     | 1.67E-02 |
| CCL5                                        | cytokine                            | 1.69E-02 |
| miR-7a-5p (and other miRNAs w/seed GGAAGAC) | mature microRNA                     | 1.78E-02 |
| N(G)-monomethyl-D-arginine                  | chemical - endogenous mammalian     | 1.78E-02 |
| FOXO1                                       | transcription regulator             | 1.79E-02 |
| IFRD1                                       | other                               | 1.89E-02 |
| PSEN1                                       | peptidase                           | 1.95E-02 |
| beta-estradiol                              | chemical - endogenous mammalian     | 1.97E-02 |
| ALDH1A2                                     | enzyme                              | 2.01E-02 |
| NCOA4                                       | transcription regulator             | 2.01E-02 |
| IRS                                         | group                               | 2.03E-02 |
| TAF3                                        | transcription regulator             | 2.03E-02 |
| DNAJA2                                      | enzyme                              | 2.03E-02 |
| STARD5                                      | transporter                         | 2.03E-02 |
| dapagliflozin                               | chemical drug                       | 2.03E-02 |
| PHYH                                        | enzyme                              | 2.03E-02 |
| aurora kinase inhibitor III                 | chemical - kinase inhibitor         | 2.03E-02 |
| FTMT                                        | enzyme                              | 2.03E-02 |
| AFDN                                        | other                               | 2.03E-02 |
| NEU1                                        | enzyme                              | 2.03E-02 |
| RDH16                                       | enzyme                              | 2.03E-02 |
| BRF110                                      | chemical reagent                    | 2.03E-02 |
| CDD450                                      | chemical drug                       | 2.03E-02 |
| actinomycin                                 | chemical - endogenous non-mammalian | 2.03E-02 |
| quinine                                     | chemical drug                       | 2.03E-02 |

|                 |                                      |          |
|-----------------|--------------------------------------|----------|
| glyphosate      | chemical toxicant                    | 2.03E-02 |
| TLE3            | other                                | 2.11E-02 |
| AHCY            | enzyme                               | 2.13E-02 |
| SCAP            | other                                | 2.24E-02 |
| cinnamaldehyde  | chemical toxicant                    | 2.24E-02 |
| bardoxolone     | chemical drug                        | 2.25E-02 |
| Insulin         | group                                | 2.27E-02 |
| PTGER4          | G-protein coupled receptor           | 2.28E-02 |
| RYR1            | ion channel                          | 2.38E-02 |
| CA9             | enzyme                               | 2.38E-02 |
| daunorubicin    | chemical drug                        | 2.38E-02 |
| TRAP1           | enzyme                               | 2.45E-02 |
| CD38            | enzyme                               | 2.47E-02 |
| Stat3-Stat3     | complex                              | 2.51E-02 |
| CEBPB           | transcription regulator              | 2.51E-02 |
| hydrocortisone  | chemical - endogenous<br>mammalian   | 2.52E-02 |
| EGLN            | group                                | 2.52E-02 |
| ST1926          | chemical drug                        | 2.52E-02 |
| TSC2            | other                                | 2.57E-02 |
| Hbb-b1          | transporter                          | 2.59E-02 |
| GNB2            | enzyme                               | 2.64E-02 |
| nicotinic acid  | chemical - endogenous<br>mammalian   | 2.64E-02 |
| RARG            | ligand-dependent nuclear<br>receptor | 2.66E-02 |
| SKA3            | other                                | 2.70E-02 |
| GPR55           | G-protein coupled receptor           | 2.70E-02 |
| tyrosine kinase | group                                | 2.70E-02 |
| MCU             | ion channel                          | 2.70E-02 |
| CCDC3           | other                                | 2.70E-02 |
| FDX2            | transporter                          | 2.70E-02 |
| OPN3            | G-protein coupled receptor           | 2.70E-02 |
| MITF-p300/CBP   | complex                              | 2.70E-02 |
| PX 478          | chemical drug                        | 2.70E-02 |
| GH2             | other                                | 2.70E-02 |

|                                 |                                 |          |
|---------------------------------|---------------------------------|----------|
| FGD5-AS1                        | other                           | 2.70E-02 |
| mir-32                          | microRNA                        | 2.70E-02 |
| FDXR                            | enzyme                          | 2.70E-02 |
| HAP1                            | other                           | 2.70E-02 |
| AK4                             | kinase                          | 2.70E-02 |
| diamide                         | chemical reagent                | 2.70E-02 |
| 9-cis-retinal                   | chemical - endogenous mammalian | 2.70E-02 |
| thymeleatoxin                   | chemical toxicant               | 2.70E-02 |
| MBTD1                           | other                           | 2.77E-02 |
| Immunoglobulin                  | complex                         | 2.78E-02 |
| DYSF                            | other                           | 2.81E-02 |
| methamphetamine                 | chemical drug                   | 2.81E-02 |
| lipopolysaccharide              | chemical drug                   | 2.88E-02 |
| PRKN                            | enzyme                          | 2.89E-02 |
| HDL-cholesterol                 | complex                         | 2.91E-02 |
| CARM1                           | transcription regulator         | 2.91E-02 |
| GNB1                            | enzyme                          | 2.91E-02 |
| BTG2                            | transcription regulator         | 2.91E-02 |
| sucrose                         | chemical - endogenous mammalian | 2.91E-02 |
| HDAC3                           | transcription regulator         | 3.04E-02 |
| ATP7B                           | transporter                     | 3.05E-02 |
| CTF1                            | cytokine                        | 3.05E-02 |
| GLI1                            | transcription regulator         | 3.14E-02 |
| SAMMSON                         | other                           | 3.19E-02 |
| M344                            | chemical reagent                | 3.19E-02 |
| dihydrotestosterone             | chemical - endogenous mammalian | 3.27E-02 |
| N-nitro-L-arginine methyl ester | chemical drug                   | 3.28E-02 |
| propofol                        | chemical drug                   | 3.34E-02 |
| PAX5-ELN                        | fusion gene/product             | 3.34E-02 |
| S-nitrosoglutathione            | chemical toxicant               | 3.34E-02 |
| PSEN2                           | peptidase                       | 3.36E-02 |
| inositol                        | chemical drug                   | 3.37E-02 |
| ginsenoside Re                  | chemical drug                   | 3.37E-02 |

|                                                    |                                 |          |
|----------------------------------------------------|---------------------------------|----------|
| ZC3H10                                             | other                           | 3.37E-02 |
| MPC1                                               | transporter                     | 3.37E-02 |
| ALDH3A2                                            | enzyme                          | 3.37E-02 |
| insulin detemir                                    | biologic drug                   | 3.37E-02 |
| miR-202-3p (and other miRNAs w/seed GAGGUAU)       | mature microRNA                 | 3.37E-02 |
| mir-191                                            | microRNA                        | 3.37E-02 |
| BCAR3                                              | other                           | 3.37E-02 |
| tofogliflozin                                      | chemical drug                   | 3.37E-02 |
| Meis1                                              | transcription regulator         | 3.37E-02 |
| mini-GAGR                                          | chemical reagent                | 3.37E-02 |
| CB-PIC                                             | chemical reagent                | 3.37E-02 |
| chlorine                                           | chemical toxicant               | 3.37E-02 |
| SLC27A2                                            | transporter                     | 3.48E-02 |
| pituitary adenylate cyclase-activating polypeptide | biologic drug                   | 3.48E-02 |
| NGF                                                | growth factor                   | 3.56E-02 |
| trans-hydroxytamoxifen                             | chemical drug                   | 3.57E-02 |
| PPARGC1A                                           | transcription regulator         | 3.59E-02 |
| ethanol                                            | chemical - endogenous mammalian | 3.62E-02 |
| HBA1/HBA2                                          | transporter                     | 3.63E-02 |
| LRP5                                               | transmembrane receptor          | 3.63E-02 |
| ESRRB                                              | transcription regulator         | 3.79E-02 |
| thyroid hormone                                    | chemical - endogenous mammalian | 3.82E-02 |
| uranyl nitrate                                     | chemical toxicant               | 3.88E-02 |
| HNRNPH1                                            | other                           | 3.94E-02 |
| CUL4B                                              | other                           | 3.94E-02 |
| NFIB                                               | transcription regulator         | 3.94E-02 |
| bafilomycin A1                                     | chemical drug                   | 3.94E-02 |
| MTOR                                               | kinase                          | 3.96E-02 |
| SERCA                                              | group                           | 4.03E-02 |
| Cbp/p300-Maf-Nfe2l2                                | complex                         | 4.03E-02 |
| PGRMC2                                             | transporter                     | 4.03E-02 |
| VANGL2                                             | other                           | 4.03E-02 |

|                                            |                                 |          |
|--------------------------------------------|---------------------------------|----------|
| GSK690693                                  | chemical drug                   | 4.03E-02 |
| KCNIP2                                     | transporter                     | 4.03E-02 |
| miR-137-3p (miRNAs w/seed UAUUGCU)         | mature microRNA                 | 4.03E-02 |
| SRPK1                                      | kinase                          | 4.03E-02 |
| NOCT                                       | transcription regulator         | 4.03E-02 |
| CAMK1                                      | kinase                          | 4.03E-02 |
| BARD1                                      | transcription regulator         | 4.03E-02 |
| zonisamide                                 | chemical drug                   | 4.03E-02 |
| GSK2837808A                                | chemical reagent                | 4.03E-02 |
| Z-Leu-Leu-Leu-B(OH) <sub>2</sub>           | chemical reagent                | 4.03E-02 |
| methyllycoponitine                         | chemical toxicant               | 4.03E-02 |
| N-retinylidene-N-retinylethanolamine       | chemical - endogenous mammalian | 4.03E-02 |
| 2,4,5,2',4',5'-hexachlorobiphenyl          | chemical toxicant               | 4.06E-02 |
| IRF4                                       | transcription regulator         | 4.08E-02 |
| topotecan                                  | chemical drug                   | 4.08E-02 |
| doxorubicin                                | chemical drug                   | 4.12E-02 |
| palmitic acid                              | chemical - endogenous mammalian | 4.17E-02 |
| SCD                                        | enzyme                          | 4.22E-02 |
| H2AX                                       | transcription regulator         | 4.26E-02 |
| ADRA1B                                     | G-protein coupled receptor      | 4.26E-02 |
| ADRA1D                                     | G-protein coupled receptor      | 4.26E-02 |
| n-3 fatty acids                            | chemical drug                   | 4.26E-02 |
| SREBF1                                     | transcription regulator         | 4.28E-02 |
| Rxr                                        | group                           | 4.33E-02 |
| SPARC                                      | other                           | 4.33E-02 |
| miR-1-3p (and other miRNAs w/seed GGAAUGU) | mature microRNA                 | 4.35E-02 |
| PAF1                                       | other                           | 4.42E-02 |
| PDX1                                       | transcription regulator         | 4.49E-02 |
| ONECUT1                                    | transcription regulator         | 4.50E-02 |
| Hedgehog                                   | group                           | 4.58E-02 |
| ZNF100                                     | transcription regulator         | 4.68E-02 |
| ZNF85                                      | transcription regulator         | 4.68E-02 |



|                         |                                   |          |
|-------------------------|-----------------------------------|----------|
| ZNF254                  | transcription regulator           | 4.68E-02 |
| RASSF8                  | other                             | 4.68E-02 |
| ZNF431                  | transcription regulator           | 4.68E-02 |
| USP29                   | peptidase                         | 4.68E-02 |
| ACIN1                   | enzyme                            | 4.68E-02 |
| PDE6B                   | enzyme                            | 4.68E-02 |
| COMT                    | enzyme                            | 4.68E-02 |
| RHEB                    | enzyme                            | 4.68E-02 |
| PDE3A                   | enzyme                            | 4.68E-02 |
| ZNF665                  | other                             | 4.68E-02 |
| ZNF528                  | other                             | 4.68E-02 |
| HOXC-AS3                | other                             | 4.68E-02 |
| ZNF43                   | transcription regulator           | 4.68E-02 |
| ZNF429                  | transcription regulator           | 4.68E-02 |
| SORL1                   | transporter                       | 4.68E-02 |
| SENP2                   | peptidase                         | 4.68E-02 |
| GNMT                    | enzyme                            | 4.68E-02 |
| ZNF708                  | other                             | 4.68E-02 |
| thenoyltrifluoroacetone | chemical reagent                  | 4.68E-02 |
| HI-TOPK32               | chemical reagent                  | 4.68E-02 |
| RORC                    | ligand-dependent nuclear receptor | 4.71E-02 |
| RICTOR                  | other                             | 4.79E-02 |
| IL5                     | cytokine                          | 4.91E-02 |
| inosine                 | chemical - endogenous mammalian   | 4.92E-02 |
| MAP2K5                  | kinase                            | 4.92E-02 |
| ADRA1A                  | G-protein coupled receptor        | 4.92E-02 |
| CTBP1                   | enzyme                            | 4.92E-02 |
| cisplatin               | chemical drug                     | 4.93E-02 |
| KMT2D                   | transcription regulator           | 5.00E-02 |
| quercetin               | chemical drug                     | 7.22E-02 |
| acetaminophen           | chemical drug                     | 8.35E-02 |

### 3. Supplementary Figures and Legends

Figure S1



**Figure S1. Activation of p-AKT, YAP1 and SOX9 in human liver diseases with higher risk for the development of ICC.** (A) Representative human liver section images used for arbitrary scoring for p-AKT, SOX9 and YAP1 expression by IHC. Grade 0, no expression; grade 1 < 20%; grade 2 < 50% (Grade 1 and 2 are considered positive). (B) Comparison of the number of patients with positive expression of SOX9, YAP1, or p-AKT in HCs shows an enrichment in positive HCs among PSC and NASH patients vs healthy controls. (C-E) Overlap in the expression of YAP1, SOX9, and p-AKT among patients with PSC and NASH shows most patients have at least 2 of 3 markers upregulated. Scale bars: 100  $\mu$ m. \* $p < 0.05$ ; \*\*\*\* $p < 0.0001$ .

**Figure S2**



**Figure S2. DNMT1 expression in mouse liver. (A)** ChIP-seq data for TEAD4 binding sites on *Dnmt1* genomic regions are collected from GEO GSM2882182. **(B)** Predicted TEAD2/TEAD3/TEAD4 binding sites located at 5,000 bp upstream from *Dnmt1* transcription start site. **(C)** IHC staining for *Akt-NICD* KO ICC liver at 5 weeks post HDTV1 showing strong DNMT1 expression in CD45<sup>+</sup> immune cells whereas weak expression in HCs (arrows). **(D)** Co-IF showing strong nuclear DNMT1 expression in

subset of CK-19+ cholangiocytes but not in CD31+ endothelial cells in the liver. **(E)** Representative WB from two independent experiment shows weak DNMT1 expression in HNF4a-enriched mouse primary HCs while strong augment of DNMT1 during transformation into ICC cells. **(F)** Table summarizing the DNMT1 expression pattern in diverse cell types in the liver. scale bar: 100 um.

Journal Pre-proof

Figure S3



**Figure S3. DNMT1 expression in HC-derived ICC models. (A)** Representative IHC staining of Sox9 expression plasmid-injected liver 3 weeks after injection showing absence of DNMT1 expression in Sox9 singular-transduced HCs. **(B)** Representative IHC staining of liver from *Akt-Fbxw7 $\Delta$ F*-driven ICC shows strong DNMT1 expression (100x). **(C)** Representative IHC staining of liver from *KRAS-sh-p53*-driven ICC shows strong

DNMT1 expression (100x). **(D)** Representative IHC staining of liver from *Akt-YAP*-driven ICC shows strong DNMT1 expression (100x). **(E)** Representative IHC staining of liver from TAA-administered mice at 24 weeks. IHC staining indicates panCK<sup>+</sup>;SOX9<sup>+</sup>;HNF4 $\alpha$ <sup>-</sup>;DNMT1<sup>+</sup> ICC with biliary morphology. **(F)** Representative TUNEL staining of liver from vehicle or 5-azacytidine-treated mice bearing *Akt-YAP1*-liver cancer at 3 weeks post HDTV1. Arrows indicate TUNEL<sup>+</sup> cells. Scale bars:100  $\mu$ m.

Journal Pre-proof

**Figure S4**



**Figure S4. DNMT1 in HC-driven ICC. (A and B)** Experimental design illustrating plasmids used for HDTV1, mice used in study and time-points analyzed. IHC staining for *Akt-NICD-Yap1* KO ICC at 5 weeks post HDTV1 showing strong DNMT1 expression. **(C)**



**and D)** Experimental design illustrating use of NICD alone or NICD + dn-TEAD plasmids for HDTV1 and time-points analyzed. Representative IHC staining of *NICD-Empty* or *NICD-DN-TEAD* injected livers showing *NICD*-transfected cells (MYC-tag<sup>+</sup>) with intact HC-to-ICC reprogramming with loss of HNF4 $\alpha$  and gain of YAP, panCK and DNMT1. *DN-TEAD* livers showing *NICD*-transfected cells with defective HC-to-BEC reprogramming with continued HNF4 $\alpha$  staining and absent of DNMT1 in YAP1<sup>-</sup> HCs (black arrows). **(D)** Experimental design illustrating 5-Azacytidine treatment, plasmid used for HDTV1, mice used in study and time-point analyzed. **(E)** Representative IHC images for HA-tag (AKT), MYC-tag (NICD), and panCK showing dramatic tumor development in *Akt-NICD* WT livers and normal histology in 5-Azacytidine-treated livers at 5 weeks post HDTV1. Scale bars:100  $\mu$ m.

Figure S5



**Figure S5: Pharmacologic DNMT1 inhibition does not reduce advanced AN-ICC tumor burden. (A)** Experimental design illustrating 5-Azacytidine treatment, plasmids used for HDTV1, mice used in study and time-points analyzed. **(B)** Representative gross images show comparable *Akt-NICD* tumor development between Vehicle or 5-Azacytidine-treated livers at 5w post-injection **(C)** LW/BW ratio depicts comparable tumor burden in Vehicle or 5-Azacytidine-treated animals at 5w. **(D)** Kaplan-Meier survival curve showing comparable survival rate between Vehicle or 5-Azacytidine-treated mouse bearing AN-ICC. **(E)** Representative IHC images of 5w vehicle- or 5-Azacytidine-treated livers bearing *Akt-NICD*-driven ICC component positive for panCK. Ns, not significant; Scale bar: 100um.

**Figure S6**



**Figure S6:** Concomitant expression of *mysAkt* and *Dnmt1* in a subset of murine HCs in vivo induces liver cancer development including ICC. **(A)** Experimental design illustrating plasmids used for HDTV1, mice used in study and time-points analyzed. **(C)** Representative IHC images of 5w *Akt-Dnmt1* show HCC and few ICC components to be positive. **(B)** In *Dnmt1-Empty* liver, no tumor was seen and all V5-tag<sup>+</sup> cells retained HC morphology without clonal expansion. Scale bars: 100 $\mu$ m.

Figure S7



Figure S7. DNMT1 and p-AKT co-expression in PSC cases with ICC-like regions.

(A) Representative IHC images of liver section from patients with PSC showing increased nuclear DNMT1 in HCs as compared to NASH or healthy liver. Black arrows point to DNMT1<sup>-</sup> hepatocytes; red arrows to DNMT1<sup>+</sup> hepatocytes. (B) Stacked-bar graph

showing higher incidence of nuclear DNMT1 in HCs in PSC patient livers compared with NASH and healthy livers. **(C and D)** Representative IHC images showing ICC-like premalignant foci in only a subset of PSC patient livers which also showed aberrant expression of p-AKT and DNMT1 in SOX9+ cells. Green dashed lines depicts SOX9+;DNMT1+;p-AKT<sup>-</sup> cells and Red dashed lines depicts SOX9+;DNMT1+;p-AKT<sup>+</sup> cells. Scale bars:100 μm

Journal Pre-proof
